# Supplementary material
Source: Research Square preprint supplement (doi:10.21203/rs.3.rs-9412701/v1)
Supplement: Supplementary file 1 [file 425b2a1b310b5c2a3a3b9e1a.docx]

Supplementary Material

Yu-Jung Lin1, Pei-Yun Li2,3, Shao-Chia Chen2,3, Gideon Meyerowitz-Katz4, Yu-Nan Huang2,3, Pen-Hua Su2,3. GLP-1 Receptor Agonist Add-On at Immune Checkpoint Inhibitor Initiation and Fewer Wasting-Related Diagnoses and Acute-Care Episodes in People with Cancer and Obesity without Diabetes: A Target Trial Emulation

1Department of Research, Taipei Tzu Chi Hospital, Buddhist Tzu Chi Medical Foundation, New Taipei, Taiwan; 2Division of Genetics and Endocrinology, Department of Pediatrics, Chung Shan Medical University Hospital, Taichung, Taiwan; 3School of Medicine, Chung Shan Medical University; Taichung, Taiwan; 4School of Health and Society, University of Wollongong, Wollongong, Australia. Yu-Nan Huang and Pen-Hua Su should be considered joint senior author.

Correspondence to:

Pen-Hua Su, MD, PhD

Division of Genetics and Metabolism, Department of Pediatrics, Chung Shan Medical University Hospital.

No. 110, Sec. 1, Jianguo N. Rd., South Dist., Taichung City 402306, Taiwan (R.O.C.)

E-mail: [ninaphsu@gmail.com](mailto:ninaphsu@gmail.com)

Tel: +886 4739595 (Ext. 21707)

Supplemental Online Content

Supplementary Table 1. Target-trial emulation design

Supplementary Table 2. Demographic, diagnostic, procedural, medication, visit, and laboratory codes used in the definition of the cohorts.

Supplementary Table 3. Demographic, diagnostic, laboratory, and medication codes used in the definition of covariates.

Supplementary Table 4. Diagnostic codes used in the definition of outcomes.

Supplementary Table 5. Baseline characteristics before and after propensity-score matching in the target-trial emulation of concomitant GLP-1 receptor agonist use during ICI therapy among individuals with neoplasms and obesity.

Supplementary Table 6. GLP-1 receptor agonist–related safety outcomes during immune checkpoint inhibitor therapy among individuals with obesity and cancer.

Supplementary **Figure 1.** Standardized mean differences before and after matching.

SupplementaryFigure 2. Hazard ratios for clinical outcomes at 12, 24, and 36 months among matched patients receiving immune checkpoint inhibitors with vs without concomitant GLP-1 receptor agonists.

Supplementary **Figure 3.** Sensitivity Analysis - Specifying the Semaglutide Brand.

Supplementary **Figure 4.** Sensitivity Analysis – 12-months washout.

**Supplementary Figure 5.** Sensitivity analysis - Three-month landmark.

**Supplementary Figure 6.** Sensitivity Analysis – Global region.

Supplementary **Figure 7. Longitudinal trajectories of body weight and body mass index after immune checkpoint inhibitor initiation in the propensity score matched cohort.**

Supplementary Table 1. Target-trial emulation design

| Protocol component | Target trial | Emulated trial |
| --- | --- | --- |
| Aim | Compare clinical outcomes after initiating immune checkpoint inhibitor (ICI) therapy with concomitant GLP-1 receptor agonist (GLP-1 RA) use versus initiating ICI therapy without concomitant GLP-1 RA use among adults with cancer and obesity, focusing on all-cause mortality, immune-related adverse events, healthcare utilization, and selected GLP-1 RA safety outcomes. | Same objective operationalized using de-identified electronic health record data from the TriNetX US Collaborative Network (70 organizations). |
| Population & eligibility | Adults (18 years or older) with malignant neoplasms and obesity eligible to initiate ICI therapy, without diabetes and without glucose-lowering therapy during a 12-month baseline period. Require a 3-month GLP-1 RA washout before treatment initiation. Exclude solid organ transplantation, prior bariatric surgery, documented HIV infection, or end stage renal disease. For each endpoint, exclude individuals with a history of that endpoint before treatment initiation from that endpoint’s risk set. | Adults with malignant neoplasms and obesity (ICD-10-CM E66 or BMI at least 27 kg/m2) who initiated a first qualifying ICI between January 1, 2021 and October 31, 2025, with at least 12 months of prior EHR activity. Excluded if any diabetes diagnosis codes or prescriptions for glucose-lowering drugs (including insulin and non-insulin agents) were present during baseline. Additional exclusions were prior GLP-1 RA exposure within 3 months before index or failure to meet the 3-month washout, and history of solid organ transplantation, bariatric surgery, HIV, or end stage renal disease. Prior occurrences of each endpoint were excluded from that endpoint’s analysis risk set. |
| Interventions | (A) Start GLP‑1 RA at ICI initiation; (B) Start ICI without GLP‑1 RA. ICIs include PD‑1, PD‑L1, CTLA‑4 agents. | Exposure (A) defined by GLP‑1 RA prescription/administration overlapping the ICI index date; comparator (B) no GLP‑1 RA at index. ICI classes and combinations captured from medication records. |
| Assignment & time zero | Random 1:1 allocation at ICI start; time zero = first qualifying ICI administration after eligibility. | New‑user; time zero = first ICI after all criteria met with overlapping GLP‑1 RA (exposed) or without (unexposed). |
| Follow‑up | From the day after treatment initiation until the earliest of the outcome event, death, last recorded encounter, or administrative censoring at 36 months. | Identical follow-up definition. The primary analysis used an intention-to-treat contrast. Prespecified sensitivity analyses included per-protocol (on treatment) definitions with grace periods and censoring at discontinuation or switching, and a 90 day landmark analysis excluding the first 3 months of follow-up. |
| Outcomes | Primary endpoint: wasting-related diagnoses, defined as a composite of sarcopenia, cachexia, or protein-calorie malnutrition. Key secondary endpoints: acute-care utilization (all-cause hospitalization, ICU/critical care use, and emergency department visits). Contextual secondary outcomes: all-cause mortality and immune-related adverse events. Selected GLP-1 RA safety outcomes and negative control outcomes were prespecified for descriptive and calibration purposes. | Endpoints were operationalized using ICD-10-CM, CPT/HCPCS, and visit-type codes as specified in Table S4. Wasting-related diagnoses were analyzed as the primary endpoint, and acute-care utilization outcomes were analyzed as key secondary endpoints. All-cause mortality and immune-related adverse events were evaluated as contextual secondary outcomes. Negative control outcomes were used for calibration. |
| Causal contrasts | Intention-to-treat and per-protocol (on treatment) effects, with additional prespecified sensitivity analyses. | Intention-to-treat was primary. Sensitivity analyses included per-protocol with grace periods, a 90 day landmark analysis, restriction of exposure to semaglutide, an alternative 12 month GLP-1 RA washout, negative control outcome calibration, and replication in the TriNetX Global Network. |
| Statistical analysis | Cox proportional hazards models for hazard ratios with 95% confidence intervals; Kaplan Meier and log-rank tests; multiplicity control; prespecified sensitivity analyses. | Cox proportional hazards models in 1:1 propensity score matched cohorts; Kaplan Meier curves and 36 month absolute risk differences; Benjamini Hochberg false discovery rate procedure for prespecified secondary endpoints; E-values for the primary endpoint; diagnostics and figures generated on exported aggregates. |

Supplementary Table 2. Demographic, diagnostic, procedural, medication, visit, and laboratory codes used in the definition of the cohorts.

| **Category** | **Code** | **Description** |
| --- | --- | --- |
| **ICI+GLP-1 RA group** | | |
| **#1: At least 18 years old (must have the following).** | | |
| Demographics | Age | Age (at least 18 years) |
| **#1: Individuals with neoplasms and obesity treated with ICI and GLP-1 RA (#1.3 and #1.4 must be fulfilled after #1.1 and #1.2). Date constraint: The terms in this group occurred between Jan 1, 2017 and Oct 31, 2025.** | | |
| **#1.1: Individuals with neoplasms (must have the following).** | | |
| Diagnosis | UMLS:ICD10CM:C00-D49 | Neoplasms |
| **#1.2: Individuals with obesity (must have any of the following).** | | |
| Diagnosis | UMLS:ICD10CM:E66 | Overweight and obesity |
| Laboratory | TNX:9083 | BMI (at least 27.00 kg/m2) |
| **#1.3: Receiving ICI (must have any of the following).** | | |
| Procedure | UMLS:HCPCS:J9271 | Injection, pembrolizumab, 1 mg |
| Procedure | UMLS:HCPCS:J9299 | Injection, nivolumab, 1 mg |
| Procedure | UMLS:HCPCS:J9022 | Injection, atezolizumab, 10 mg |
| Procedure | UMLS:HCPCS:J9173 | Injection, durvalumab, 10 mg |
| Procedure | UMLS:HCPCS:J9119 | Injection, cemiplimab-rwlc, 1 mg |
| Procedure | UMLS:HCPCS:J9023 | Injection, avelumab, 10 mg |
| Medication | NLM:RXNORM:1547545 | Pembrolizumab |
| Medication | NLM:RXNORM:1597876 | Nivolumab |
| Medication | NLM:RXNORM:1792776 | Atezolizumab |
| Medication | NLM:RXNORM:1919503 | Durvalumab |
| Medication | NLM:RXNORM:2058826 | Cemiplimab |
| Medication | NLM:RXNORM:1875534 | Avelumab |
| **#1.4: Receiving GLP-1 RA (must have the following).** | | |
| Medication | NLM:ATC:A10BJ | Glucagon-like peptide-1 (GLP-1) analogues |
| **#2: Without bariatric surgery, transplantation, HIV, ESRD, type 2 diabetes (cannot have any of the following). #2 must be fulfilled within 3 years on or before #1.** | | |
| Oncology | NAACCR:BIOM:3859 | HIV Status |
| Diagnosis | UMLS:ICD10CM:B20 | Human immunodeficiency virus [HIV] disease |
| Procedure | UMLS:ICD10PCS:0TY | Transplantation |
| Diagnosis | UMLS:ICD10CM:Z94 | Transplanted organ and tissue status |
| Diagnosis | UMLS:ICD10CM:Z98.84 | Bariatric surgery status |
| Procedure | UMLS:CPT:1007385 | Bariatric Surgery Procedures |
| Diagnosis | UMLS:ICD10CM:N18.6 | End stage renal disease |
| Diagnosis | UMLS:ICD10CM:E11 | Type 2 diabetes mellitus |
| **#3: Without prior exposure to the following medications (cannot have any of the following). #3 must be fulfilled within 3 months on or before #1.1 and #1.2.** | | |
| Medication | NLM:RXNORM:2058826 | Cemiplimab |
| Medication | NLM:RXNORM:1547545 | Pembrolizumab |
| Medication | NLM:RXNORM:1919503 | Durvalumab |
| Medication | NLM:RXNORM:1792776 | Atezolizumab |
| Medication | NLM:RXNORM:1597876 | Nivolumab |
| Medication | NLM:RXNORM:1875534 | Avelumab |
| Procedure | UMLS:HCPCS:J9271 | Injection, pembrolizumab, 1 mg |
| Procedure | UMLS:HCPCS:J9299 | Injection, nivolumab, 1 mg |
| Procedure | UMLS:HCPCS:J9022 | Injection, atezolizumab, 10 mg |
| Procedure | UMLS:HCPCS:J9173 | Injection, durvalumab, 10 mg |
| Procedure | UMLS:HCPCS:J9119 | Injection, cemiplimab-rwlc, 1 mg |
| Procedure | UMLS:HCPCS:J9023 | Injection, avelumab, 10 mg |
| Medication | NLM:ATC:A10BJ | Glucagon-like peptide-1 (GLP-1) analogues |

| **Category** | **Code** | **Description** |
| --- | --- | --- |
| **ICI group** | | |
| **#1: At least 18 years old (must have the following).** | | |
| Demographics | Age | Age (at least 18 years) |
| **#1: Individuals with neoplasms and obesity treated with ICI (#1.3 and #1.4 must be fulfilled after #1.1 and #1.2). Date constraint: The terms in this group occurred between Jan 1, 2017 and Oct 31, 2025.** | | |
| **#1.1: Individuals with neoplasms (must have the following).** | | |
| Diagnosis | UMLS:ICD10CM:C00-D49 | Neoplasms |
| **#1.2: Individuals with obesity (must have any of the following).** | | |
| Diagnosis | UMLS:ICD10CM:E66 | Overweight and obesity |
| Laboratory | TNX:9083 | BMI (at least 27.00 kg/m2) |
| **#1.3: Receiving ICI (must have any of the following).** | | |
| Procedure | UMLS:HCPCS:J9271 | Injection, pembrolizumab, 1 mg |
| Procedure | UMLS:HCPCS:J9299 | Injection, nivolumab, 1 mg |
| Procedure | UMLS:HCPCS:J9022 | Injection, atezolizumab, 10 mg |
| Procedure | UMLS:HCPCS:J9173 | Injection, durvalumab, 10 mg |
| Procedure | UMLS:HCPCS:J9119 | Injection, cemiplimab-rwlc, 1 mg |
| Procedure | UMLS:HCPCS:J9023 | Injection, avelumab, 10 mg |
| Medication | NLM:RXNORM:1547545 | Pembrolizumab |
| Medication | NLM:RXNORM:1597876 | Nivolumab |
| Medication | NLM:RXNORM:1792776 | Atezolizumab |
| Medication | NLM:RXNORM:1919503 | Durvalumab |
| Medication | NLM:RXNORM:2058826 | Cemiplimab |
| Medication | NLM:RXNORM:1875534 | Avelumab |
| **#1.4: Not receiving GLP-1 RA (cannot have the following).** | | |
| Medication | NLM:ATC:A10BJ | Glucagon-like peptide-1 (GLP-1) analogues |
| **#2: Without bariatric surgery, transplantation, HIV, ESRD, type 2 diabetes (cannot have any of the following). #2 must be fulfilled within 3 years on or before #1.** | | |
| Oncology | NAACCR:BIOM:3859 | HIV Status |
| Diagnosis | UMLS:ICD10CM:B20 | Human immunodeficiency virus [HIV] disease |
| Procedure | UMLS:ICD10PCS:0TY | Transplantation |
| Diagnosis | UMLS:ICD10CM:Z94 | Transplanted organ and tissue status |
| Diagnosis | UMLS:ICD10CM:Z98.84 | Bariatric surgery status |
| Procedure | UMLS:CPT:1007385 | Bariatric Surgery Procedures |
| Diagnosis | UMLS:ICD10CM:N18.6 | End stage renal disease |
| Diagnosis | UMLS:ICD10CM:E11 | Type 2 diabetes mellitus |
| **#3: Without prior exposure to the following medications (cannot have any of the following). #3 must be fulfilled within 3 months on or before #1.1 and #1.2.** | | |
| Medication | NLM:RXNORM:2058826 | Cemiplimab |
| Medication | NLM:RXNORM:1547545 | Pembrolizumab |
| Medication | NLM:RXNORM:1919503 | Durvalumab |
| Medication | NLM:RXNORM:1792776 | Atezolizumab |
| Medication | NLM:RXNORM:1597876 | Nivolumab |
| Medication | NLM:RXNORM:1875534 | Avelumab |
| Procedure | UMLS:HCPCS:J9271 | Injection, pembrolizumab, 1 mg |
| Procedure | UMLS:HCPCS:J9299 | Injection, nivolumab, 1 mg |
| Procedure | UMLS:HCPCS:J9022 | Injection, atezolizumab, 10 mg |
| Procedure | UMLS:HCPCS:J9173 | Injection, durvalumab, 10 mg |
| Procedure | UMLS:HCPCS:J9119 | Injection, cemiplimab-rwlc, 1 mg |
| Procedure | UMLS:HCPCS:J9023 | Injection, avelumab, 10 mg |
| Medication | NLM:ATC:A10BJ | Glucagon-like peptide-1 (GLP-1) analogues |

Supplementary Table 3. Demographic, diagnostic, laboratory, and medication codes used in the definition of covariates.

| **Category** | **Code** | **Description** |
| --- | --- | --- |
| Demographics | AI | Age at index |
| Demographics | M | Male |
| Demographics | F | Female |
| Demographics | 2106-3 | White |
| Demographics | 2054-5 | Black or African American |
| Demographics | 2131-1 | Other Race |
| Demographics | 2135-2 | Hispanic or Latino |
| Demographics | 2186-5 | Not Hispanic or Latino |
| Diagnosis | Z55-Z65 | Persons with potential health hazards related to socioeconomic and psychosocial circumstances |
| Diagnosis | C34 | Malignant neoplasm of bronchus and lung |
| Diagnosis | C43 | Malignant melanoma of skin |
| Diagnosis | C50 | Malignant neoplasm of breast |
| Diagnosis | C64 | Malignant neoplasm of kidney, except renal pelvis |
| Diagnosis | C67 | Malignant neoplasm of bladder |
| Diagnosis | C77 | Secondary and unspecified malignant neoplasm of lymph nodes |
| Diagnosis | C78 | Secondary malignant neoplasm of respiratory and digestive organs |
| Diagnosis | C79 | Secondary malignant neoplasm of other and unspecified sites |
| Diagnosis | Z72.0 | Tobacco use |
| Diagnosis | F17 | Nicotine dependence |
| Diagnosis | F10 | Alcohol related disorders |
| Diagnosis | I20-I25 | Ischemic heart diseases |
| Diagnosis | N18 | Chronic kidney disease (CKD) |
| Diagnosis | J44 | Other chronic obstructive pulmonary disease |
| Diagnosis | J45 | Asthma |
| Diagnosis | J84 | Other interstitial pulmonary diseases |
| Diagnosis | I60-I69 | Cerebrovascular diseases |
| Diagnosis | I70-I79 | Diseases of arteries, arterioles and capillaries |
| Diagnosis | U07.1 | COVID-19 |
| Diagnosis | K70-K77 | Diseases of liver |
| Diagnosis | I50 | Heart failure |
| Diagnosis | E00-E07 | Disorders of thyroid gland |
| Diagnosis | D80-D89 | Certain disorders involving the immune mechanism |
| Medication | 6809 | metformin |
| Medication | A10BH | Dipeptidyl peptidase 4 (DPP-4) inhibitors |
| Medication | BL110 | ANTICOAGULANTS |
| Medication | C09AA | ACE inhibitors, plain |
| Medication | C10AA | HMG CoA reductase inhibitors |
| Medication | A10BK | Sodium-glucose co-transporter 2 (SGLT2) inhibitors |
| Medication | L04 | IMMUNOSUPPRESSANTS |
| Medication | H02AB | Glucocorticoids |
| Medication | L01 | ANTINEOPLASTIC AGENTS |
| Medication | HS501 | INSULIN |
| Medication | J01 | ANTIBACTERIALS FOR SYSTEMIC USE |
| Medication | C09C | ANGIOTENSIN II RECEPTOR BLOCKERS (ARBs), PLAIN |
| Laboratory | 9083 | BMI |
| Laboratory | 9037 | Hemoglobin A1c/Hemoglobin.total in Blood |
| Laboratory | 9020 | Platelets [#/volume] in Blood |
| Laboratory | 9018 | Neutrophils [#/volume] in Blood |
| Laboratory | 9024 | Creatinine [Mass/volume] in Serum, Plasma or Blood |
| Laboratory | 9050 | Bilirubin.total [Mass/volume] in Serum, Plasma or Blood |
| Laboratory | 8001 | Glomerular filtration rate/1.73 sq M.predicted [Volume Rate/Area] in Serum, Plasma or Blood by Creatinine-based formula (MDRD) |
| Laboratory | 9002 | Cholesterol in LDL [Mass/volume] in Serum or Plasma |
| Laboratory | 9001 | Cholesterol in HDL [Mass/volume] in Serum or Plasma |
| Laboratory | 9063 | C reactive protein [Mass/volume] in Serum, Plasma or Blood |
| Laboratory | 9004 | Triglyceride [Mass/volume] in Serum, Plasma or Blood |
| Laboratory | 9047 | Aspartate aminotransferase [Enzymatic activity/volume] in Serum or Plasma |
| Procedures | 1010843 | Radiation Oncology Treatment |
| Procedures | 1003143 | Surgery |
| Visits | EMER | Visit: Emergency |
| Visits | IMP | Visit: Inpatient Encounter |
| Visits | OBSENC | Visit: Observation Encounter |

Supplementary Table 4. Diagnostic codes used in the definition of outcomes.

| **Category** | **Code** | **Description** |
| --- | --- | --- |
| **#1: All-cause mortality** (have any of the following) | | |
| Diagnosis | UMLS:ICD10CM:R99-R99 | Ill-defined and unknown cause of mortality (R99) |
| Demographics | UMLS:ICD10CM:R69 | Illness, unspecified |
| **#2: Immune-related adverse event** (have any of the following) | | |
| Diagnosis | UMLS:ICD10CM:E03.9 | Hypothyroidism, unspecified |
| Diagnosis | UMLS:ICD10CM:E06.3 | Autoimmune thyroiditis |
| Diagnosis | UMLS:ICD10CM:E23.2 | Diabetes insipidus |
| Diagnosis | UMLS:ICD10CM:E27.40 | Unspecified adrenocortical insufficiency |
| Diagnosis | UMLS:ICD10CM:R73.9 | Hyperglycemia, unspecified |
| Diagnosis | UMLS:ICD10CM:E11.65 | Type 2 diabetes mellitus with hyperglycemia |
| Diagnosis | UMLS:ICD10CM:E13.65 | Other specified diabetes mellitus with hyperglycemia |
| Diagnosis | UMLS:ICD10CM:E10.65 | Type 1 diabetes mellitus with hyperglycemia |
| Diagnosis | UMLS:ICD10CM:E09.65 | Drug or chemical induced diabetes mellitus with hyperglycemia |
| Diagnosis | UMLS:ICD10CM:J84.89 | Other specified interstitial pulmonary diseases |
| Diagnosis | UMLS:ICD10CM:K52.89 | Other specified noninfective gastroenteritis and colitis |
| Diagnosis | UMLS:ICD10CM:E23.0 | Hypopituitarism |
| Diagnosis | UMLS:ICD10CM:E27.40 | Unspecified adrenocortical insufficiency |
| Diagnosis | UMLS:ICD10CM:E10.9 | Type 1 diabetes mellitus without complications |
| **#3: ir-ILD/Pneumonitis** (have any of the following) | | |
| Diagnosis | UMLS:ICD10CM:J70.2 | Acute drug-induced interstitial lung disorders |
| Diagnosis | UMLS:ICD10CM:J70.3 | Chronic drug-induced interstitial lung disorders |
| Diagnosis | UMLS:ICD10CM:J70.4 | Drug-induced interstitial lung disorders, unspecified |
| Diagnosis | UMLS:ICD10CM:J84.10 | Pulmonary fibrosis, unspecified |
| Diagnosis | UMLS:ICD10CM:J84.89 | Other specified interstitial pulmonary diseases |
| Diagnosis | UMLS:ICD10CM:J84.9 | Interstitial pulmonary disease, unspecified |
| **#4: Colitis/Enteritis** (have any of the following) | | |
| Diagnosis | UMLS:ICD10CM:K52.89 | Other specified noninfective gastroenteritis and colitis |
| Diagnosis | UMLS:ICD10CM:T45.AX5 | Adverse effect of immune checkpoint inhibitors and immunostimulant drugs |
| **#5: Hepatitis** (have any of the following) | | |
| Diagnosis | UMLS:ICD10CM:K75.4 | Autoimmune hepatitis |
| Diagnosis | UMLS:ICD10CM:K71.6 | Toxic liver disease with hepatitis, not elsewhere classified |
| Diagnosis | UMLS:ICD10CM:T45.AX5 | Adverse effect of immune checkpoint inhibitors and immunostimulant drugs |
| **#6: Endocrinopathies** (have any of the following) | | |
| Diagnosis | UMLS:ICD10CM:E03.9 | Hypothyroidism, unspecified |
| Diagnosis | UMLS:ICD10CM:E05.90 | Thyrotoxicosis, unspecified without thyrotoxic crisis or storm |
| Diagnosis | UMLS:ICD10CM:E23.0 | Hypopituitarism |
| Diagnosis | UMLS:ICD10CM:E27.40 | Unspecified adrenocortical insufficiency |
| Diagnosis | UMLS:ICD10CM:E10.9 | Type 1 diabetes mellitus without complications |
| Diagnosis | UMLS:ICD10CM:E13.9 | Other specified diabetes mellitus without complications |
| Diagnosis | UMLS:ICD10CM:T45.AX5 | Adverse effect of immune checkpoint inhibitors and immunostimulant drugs |
| **#7: Neutropenia/Agranulocytosis** (have the following) | | |
| Diagnosis | UMLS:ICD10CM:D70.1 | Agranulocytosis secondary to cancer chemotherapy |
| **#8: Peripheral neuropathy** (have the following) | | |
| Diagnosis | UMLS:ICD10CM:G62.0 | Drug-induced polyneuropathy |
| **#9: All-cause hospitalization** (have any of the following) | | |
| Visit | UMLS:HL7V3.0:VisitType:IMP | Visit: Inpatient Encounter |
| Procedure | UMLS:CPT:99221 | Initial hospital inpatient or observation care, per day, for the evaluation and management of a patient, which requires a medically appropriate history and/or examination and straightforward or low level medical decision making. When using total time on the date of the encounter for code selection, 40 minutes must be met or exceeded. |
| Procedure | UMLS:CPT:99222 | Initial hospital inpatient or observation care, per day, for the evaluation and management of a patient, which requires a medically appropriate history and/or examination and moderate level of medical decision making. When using total time on the date of the encounter for code selection, 55 minutes must be met or exceeded. |
| Procedure | UMLS:CPT:99223 | Initial hospital inpatient or observation care, per day, for the evaluation and management of a patient, which requires a medically appropriate history and/or examination and high level of medical decision making. When using total time on the date of the encounter for code selection, 75 minutes must be met or exceeded. |
| Procedure | UMLS:CPT:99231 | Subsequent hospital inpatient or observation care, per day, for the evaluation and management of a patient, which requires a medically appropriate history and/or examination and straightforward or low level of medical decision making. When using total time on the date of the encounter for code selection, 25 minutes must be met or exceeded. |
| Procedure | UMLS:CPT:99232 | Subsequent hospital inpatient or observation care, per day, for the evaluation and management of a patient, which requires a medically appropriate history and/or examination and moderate level of medical decision making. When using total time on the date of the encounter for code selection, 35 minutes must be met or exceeded. |
| Procedure | UMLS:CPT:99233 | Subsequent hospital inpatient or observation care, per day, for the evaluation and management of a patient, which requires a medically appropriate history and/or examination and high level of medical decision making. When using total time on the date of the encounter for code selection, 50 minutes must be met or exceeded. |
| **#10: ICU/Critical care use** (have any of the following) | | |
| Procedure | UMLS:CPT:99291 | Critical care, evaluation and management of the critically ill or critically injured patient; first 30-74 minutes |
| Procedure | UMLS:CPT:99292 | Critical care, evaluation and management of the critically ill or critically injured patient; each additional 30 minutes (List separately in addition to code for primary service) |
| **#11: Emergency department visits** (have any of the following) | | |
| Procedure | UMLS:CPT:99281 | Emergency department visit for the evaluation and management of a patient that may not require the presence of a physician or other qualified health care professional |
| Procedure | UMLS:CPT:99282 | Emergency department visit for the evaluation and management of a patient, which requires a medically appropriate history and/or examination and straightforward medical decision making |
| Procedure | UMLS:CPT:99283 | Emergency department visit for the evaluation and management of a patient, which requires a medically appropriate history and/or examination and low level of medical decision making |
| Procedure | UMLS:CPT:99284 | Emergency department visit for the evaluation and management of a patient, which requires a medically appropriate history and/or examination and moderate level of medical decision making |
| Procedure | UMLS:CPT:99285 | Emergency department visit for the evaluation and management of a patient, which requires a medically appropriate history and/or examination and high level of medical decision making |
| Procedure | UMLS:CPT:99291 | Critical care, evaluation and management of the critically ill or critically injured patient; first 30-74 minutes |
| Procedure | UMLS:CPT:99292 | Critical care, evaluation and management of the critically ill or critically injured patient; each additional 30 minutes (List separately in addition to code for primary service) |
| **#12: Sarcopenia/Cachexia/Malnutrition** (have any of the following) | | |
| Diagnosis | UMLS:ICD10CM:M62.84 | Sarcopenia |
| Diagnosis | UMLS:ICD10CM:R64 | Cachexia |
| Diagnosis | UMLS:ICD10CM:E43 | Unspecified severe protein-calorie malnutrition |
| Diagnosis | UMLS:ICD10CM:E44 | Protein-calorie malnutrition of moderate and mild degree |
| Diagnosis | UMLS:ICD10CM:E46 | Unspecified protein-calorie malnutrition |
| **#13: Acute pancreatitis** (have any of the following) | | |
| Diagnosis | UMLS:ICD10CM:K85 | Acute pancreatitis |
| Procedure | UMLS:CPT:74160 | Computed tomography, abdomen; with contrast material(s) |
| Procedure | UMLS:CPT:43264 | Endoscopic retrograde cholangiopancreatography (ERCP); with removal of calculi/debris from biliary/pancreatic duct(s) |
| **#14: Cholelithiasis/Cholecystitis** (have any of the following) | | |
| Diagnosis | UMLS:ICD10CM:K80 | Cholelithiasis |
| Diagnosis | UMLS:ICD10CM:K81 | Cholecystitis |
| Procedure | UMLS:CPT:47562 | Laparoscopy, surgical; cholecystectomy |
| Procedure | UMLS:CPT:47563 | Laparoscopy, surgical; cholecystectomy with cholangiography |
| Procedure | UMLS:CPT:47564 | Laparoscopy, surgical; cholecystectomy with exploration of common duct |
| Procedure | UMLS:CPT:47480 | Cholecystotomy or cholecystostomy, open, with exploration, drainage, or removal of calculus (separate procedure) |
| **#15: NAION** (have any of the following) | | |
| Diagnosis | UMLS:ICD10CM:H47.01 | Ischemic optic neuropathy |
| Procedure | UMLS:CPT:92134 | Scanning computerized ophthalmic diagnostic imaging, posterior segment, with interpretation and report, unilateral or bilateral; retina |
| **#16: Drug‑induced hypoglycaemia** (have any of the following) | | |
| Diagnosis | UMLS:ICD10CM:E16.0 | Drug-induced hypoglycemia without coma |
| Diagnosis | UMLS:ICD10CM:E11.64 | Type 2 diabetes mellitus with hypoglycemia |
| Procedure | UMLS:CPT:96374 | Therapeutic, prophylactic, or diagnostic injection (specify substance or drug); intravenous push, single or initial substance/drug |
| Procedure | UMLS:CPT:96365 | Intravenous infusion, for therapy, prophylaxis, or diagnosis (specify substance or drug); initial, up to 1 hour |
| **#17: Acute kidney injury** (have any of the following) | | |
| Diagnosis | UMLS:ICD10CM:N17 | Acute kidney failure |
| Procedure | UMLS:CPT:90935 | Hemodialysis procedure with single evaluation by a physician or other qualified health care professional |
| Procedure | UMLS:CPT:90945 | Dialysis procedure other than hemodialysis (eg, peritoneal dialysis, hemofiltration, or other continuous renal replacement therapies), with single evaluation by a physician or other qualified health care professional |
| **#18: Dehydration/Orthostatic hypotension** (have any of the following) | | |
| Diagnosis | UMLS:ICD10CM:E86.0 | Dehydration |
| Diagnosis | UMLS:ICD10CM:I95.1 | Orthostatic hypotension |
| Procedure | UMLS:CPT:96360 | Intravenous infusion, hydration; initial, 31 minutes to 1 hour |
| **#19: Suicidal ideation/Attempt** (have any of the following) | | |
| Diagnosis | UMLS:ICD10CM:R45.851 | Suicidal ideations |
| Diagnosis | UMLS:ICD10CM:T14.91 | Suicide attempt |
| Procedure | UMLS:CPT:90791 | Psychiatric diagnostic evaluation |
| Procedure | UMLS:CPT:96127 | Brief emotional/behavioral assessment (eg, depression inventory, attention-deficit/hyperactivity disorder [ADHD] scale), with scoring and documentation, per standardized instrument |
| **#20: NCOs** (have any of the following) | | |
| Diagnosis | UMLS:ICD10CM:L60.0 | Ingrowing nail |
| Diagnosis | UMLS:ICD10CM:W54.0 | Bitten by dog |
| Diagnosis | UMLS:ICD10CM:T15-T19 | Effects of foreign body entering through natural orifice |
| Diagnosis | UMLS:ICD10CM:T20-T25 | Burns and corrosions of external body surface, specified by site |
| Diagnosis | UMLS:ICD10CM:K40-K46 | Hernia |

Supplementary Table 5. Baseline characteristics before and after propensity-score matching in the target-trial emulation of concomitant GLP-1 receptor agonist use during ICI therapy among individuals with neoplasms and obesity

|  | Before Matching | | | After Matching | | |  |
| --- | --- | --- | --- | --- | --- | --- | --- |
|  | ICI +  GLP-1 RA | ICI monotherapy | SMD | ICI +  GLP-1 RA | ICI monotherapy | SMD |  |
| Characteristic | (n = 1,108) | (n = 45,485) | (n = 988) | (n = 988) |  |
| Age |  |  |  |  |  |  |  |
| Mean ± SD | 60.0 ± 12.6 | 64.5 ± 12.8 |  | 60.1 ± 12.7 | 61.5 ± 13.6 |  |  |
| < 45 years | 153 (13.8) | 3,636 (8.0) | 0.187 | 134 (13.6) | 131 (13.3) | 0.009 |  |
| 45 - 64 years | 520 (46.9) | 17,038 (37.5) | 0.193 | 461 (46.7) | 453 (45.9) | 0.016 |  |
| ≥ 65 years | 435 (39.3) | 24,811 (54.5) | 0.310 | 393 (39.8) | 404 (40.9) | 0.023 |  |
| Sex (%) |  |  |  |  |  |  |  |
| Male | 425 (38.4) | 24,157 (53.1) | 0.299 | 374 (37.9) | 365 (36.9) | 0.019 |  |
| Female | 683 (61.6) | 21,296 (46.8) | 0.301 | 614 (62.1) | 623 (63.1) | 0.019 |  |
| Race (%) |  |  |  |  |  |  |  |
| White | 864 (78.0) | 36,986 (81.3) | 0.083 | 766 (77.5) | 768 (77.7) | 0.005 |  |
| Black or African American | 144 (13.0) | 4,315 (9.5) | 0.111 | 131 (13.3) | 132 (13.4) | 0.003 |  |
| Other Race | 35 (3.2) | 1,471 (3.2) | 0.004 | 29 (2.9) | 28 (2.8) | 0.006 |  |
| Ethics (%) |  |  |  |  |  |  |  |
| Hispanic or Latino | 64 (5.8) | 2,332 (5.1) | 0.029 | 55 (5.6) | 46 (4.7) | 0.041 |  |
| Not Hispanic or Latino | 915 (82.6) | 35,873 (78.9) | 0.094 | 817 (82.7) | 834 (84.4) | 0.046 |  |
| Socioeconomic determinants |  |  |  |  |  |  |  |
| Persons with potential health hazards related to socioeconomic and psychosocial circumstances | 74 (6.7) | 2,109 (4.6) | 0.088 | 67 (6.8) | 63 (6.4) | 0.016 |  |
|  |
|  |
| Measures of healthcare utilization |  |  |  |  |  |  |  |
| Visit: inpatient encounter | 698 (63.0) | 24,287 (53.4) | 0.196 | 619 (62.7) | 613 (62.0) | 0.013 |  |
| Visit: emergency | 532 (48.0) | 18,510 (40.7) | 0.148 | 470 (47.6) | 486 (49.2) | 0.032 |  |
| Visit: observation encounter | 118 (10.7) | 4,411 (9.7) | 0.031 | 105 (10.6) | 93 (9.4) | 0.040 |  |
| Comorbidities |  |  |  |  |  |  |  |
| Diseases of liver | 436 (39.4) | 11,373 (25.0) | 0.311 | 370 (37.4) | 351 (35.5) | 0.040 |  |
| Cerebrovascular diseases | 173 (15.6) | 5,745 (12.6) | 0.086 | 152 (15.4) | 141 (14.3) | 0.031 |  |
| Heart failure | 161 (14.5) | 4,235 (9.3) | 0.162 | 137 (13.9) | 154 (15.6) | 0.049 |  |
| IHD | 337 (30.4) | 10,884 (23.9) | 0.146 | 294 (29.8) | 299 (30.3) | 0.011 |  |
| Diseases of arteries, arterioles and capillaries | 286 (25.8) | 9,517 (20.9) | 0.116 | 248 (25.1) | 230 (23.3) | 0.043 |  |
| Secondary and unspecified malignant neoplasm of lymph nodes | 392 (35.4) | 15,179 (33.4) | 0.042 | 356 (36.0) | 328 (33.2) | 0.060 |  |
| Secondary malignant neoplasm of respiratory and digestive organs | 254 (22.9) | 12,545 (27.6) | 0.107 | 219 (22.2) | 211 (21.4) | 0.020 |  |
| Secondary malignant neoplasm of other and unspecified sites | 364 (32.9) | 15,792 (34.7) | 0.039 | 324 (32.8) | 312 (31.6) | 0.026 |  |
| Malignant neoplasm of bronchus and lung | 274 (24.7) | 14,426 (31.7) | 0.156 | 255 (25.8) | 242 (24.5) | 0.030 |  |
| Malignant neoplasm of kidney, except renal pelvis | 173 (15.6) | 4,743 (10.4) | 0.155 | 144 (14.6) | 155 (15.7) | 0.031 |  |
| Malignant neoplasm of bladder | 77 (6.9) | 3,668 (8.1) | 0.042 | 69 (7.0) | 80 (8.1) | 0.042 |  |
| Malignant neoplasm of breast | 247 (22.3) | 4,568 (10.0) | 0.337 | 221 (22.4) | 229 (23.2) | 0.019 |  |
| Malignant melanoma of skin | 217 (19.6) | 6,592 (14.5) | 0.136 | 189 (19.1) | 183 (18.5) | 0.016 |  |
| CKD | 229 (20.7) | 6,036 (13.3) | 0.198 | 191 (19.3) | 185 (18.7) | 0.015 |  |
| COVID-19 | 192 (17.3) | 2,758 (6.1) | 0.356 | 165 (16.7) | 165 (16.7) | <0.001 |  |
| Other chronic obstructive pulmonary disease | 182 (16.4) | 7,848 (17.3) | 0.022 | 169 (17.1) | 160 (16.2) | 0.024 |  |
| Asthma | 215 (19.4) | 4,848 (10.7) | 0.247 | 188 (19.0) | 188 (19.0) | <0.001 |  |
| Other interstitial pulmonary diseases | 106 (9.6) | 2,103 (4.6) | 0.193 | 83 (8.4) | 92 (9.3) | 0.032 |  |
| Disorders of thyroid gland | 509 (45.9) | 11,032 (24.3) | 0.467 | 439 (44.4) | 451 (45.6) | 0.024 |  |
| Certain disorders involving the immune mechanism | 151 (13.6) | 2,154 (4.7) | 0.312 | 125 (12.7) | 111 (11.2) | 0.044 |  |
| Alcohol related disorders | 63 (5.7) | 2,877 (6.3) | 0.027 | 57 (5.8) | 47 (4.8) | 0.045 |  |
| Nicotine dependence | 251 (22.7) | 10,693 (23.5) | 0.020 | 233 (23.6) | 221 (22.4) | 0.029 |  |
| Tobacco use | 97 (8.8) | 3,970 (8.7) | <0.001 | 90 (9.1) | 84 (8.5) | 0.021 |  |
| Medications |  |  |  |  |  |  |  |
| Antineoplastic agents | 950 (85.7) | 23,844 (52.4) | 0.773 | 833 (84.3) | 848 (85.8) | 0.043 |  |
| Immunosuppressants | 128 (11.6) | 1,877 (4.1) | 0.279 | 108 (10.9) | 112 (11.3) | 0.013 |  |
| Antibacterials for systemic use | 1,045 (94.3) | 36,694 (80.7) | 0.421 | 926 (93.7) | 924 (93.5) | 0.008 |  |
| Anticoagulants | 949 (85.7) | 31,559 (69.4) | 0.397 | 835 (84.5) | 824 (83.4) | 0.030 |  |
| Glucocorticoids | 1,038 (93.7) | 37,014 (81.4) | 0.379 | 920 (93.1) | 918 (92.9) | 0.008 |  |
| HMG-CoA reductase inhibitors | 632 (57.0) | 17,664 (38.8) | 0.371 | 543 (55.0) | 531 (53.7) | 0.024 |  |
| ACE inhibitors | 395 (35.6) | 10,611 (23.3) | 0.273 | 343 (34.7) | 334 (33.8) | 0.019 |  |
| ARBs | 347 (31.3) | 8,418 (18.5) | 0.299 | 299 (30.3) | 332 (33.6) | 0.072 |  |
| Laboratory |  |  |  |  |  |  |  |
| BMI |  |  |  |  |  |  |  |
| Mean ± SD, kg/m2 | 36.5 ± 7.6 | 30.8 ± 5.8 |  | 36.3 ± 7.6 | 33.6 ± 7.3 |  |  |
| ≥ 40 kg/m2 | 433 (39.1) | 5,945 (13.1) | 0.620 | 365 (36.9) | 369 (37.3) | 0.008 |  |
| Creatinine |  |  |  |  |  |  |  |
| Mean ± SD, mg/dL | 1.1 ± 4.5 | 1.6 ± 9.2 |  | 1.1 ± 4.8 | 1.0 ± 0.4 |  |  |
| ≥ 1.3 mg/dL | 378 (34.1) | 13,749 (30.2) | 0.083 | 332 (33.6) | 334 (33.8) | 0.004 |  |
| HbA1c |  |  |  |  |  |  |  |
| Mean ± SD, % | 6.5 ± 1.6 | 5.7 ± 0.7 |  | 6.4 ± 1.5 | 6.1 ± 1.2 |  |  |
| ≥ 6.5 % | 334 (30.1) | 1,213 (2.7) | 0.799 | 238 (24.1) | 225 (22.8) | 0.031 |  |
| Platelets volume |  |  |  |  |  |  |  |
| Mean ± SD, /µL | 247.0 ± 85.1 | 259.8 ± 110.2 |  | 248.3 ± 85.5 | 251.9 ± 100.9 |  |  |
| ≥ 450,000 /µL | 220 (19.9) | 8,809 (19.4) | 0.012 | 195 (19.7) | 192 (19.4) | 0.008 |  |
| Bilirubin |  |  |  |  |  |  |  |
| Mean ± SD, mg/dL | 0.5 ± 0.7 | 0.6 ± 0.8 |  | 0.6 ± 0.7 | 0.5 ± 0.5 |  |  |
| ≥ 1.2 mg/dL | 181 (16.3) | 7,799 (17.1) | 0.022 | 160 (16.2) | 159 (16.1) | 0.003 |  |
| Neutrophils |  |  |  |  |  |  |  |
| Mean ± SD, /µL | 27.8 ± 361.6 | 28.5 ± 360.8 |  | 30.7 ± 383.8 | 33.3 ± 430.9 |  |  |
| ≥ 7,000 /µL | 659 (59.5) | 22,546 (49.6) | 0.200 | 583 (59.0) | 581 (58.8) | 0.004 |  |
| Triglyceride |  |  |  |  |  |  |  |
| Mean ± SD, mg/dL | 149.3 ± 127.9 | 130.6 ± 79.1 |  | 145.9 ± 131.9 | 141.3 ± 84.0 |  |  |
| ≥ 150 mg/dL | 412 (37.2) | 9,224 (20.3) | 0.380 | 345 (34.9) | 353 (35.7) | 0.017 |  |
| HDL |  |  |  |  |  |  |  |
| Mean ± SD, mg/dL | 47.8 ± 14.5 | 48.8 ± 16.0 |  | 48.1 ± 14.7 | 48.5 ± 14.6 |  |  |
| ≥ 50 mg/dL | 399 (36.0) | 10,672 (23.5) | 0.277 | 352 (35.6) | 350 (35.4) | 0.004 |  |
| LDL |  |  |  |  |  |  |  |
| Mean ± SD, mg/dL | 98.4 ± 37.6 | 98.3 ± 37.3 |  | 99.2 ± 37.1 | 98.6 ± 36.7 |  |  |
| ≥ 130 mg/dL | 298 (26.9) | 7,448 (16.4) | 0.258 | 257 (26.0) | 263 (26.6) | 0.014 |  |
| eGFR |  |  |  |  |  |  |  |
| Mean ± SD, mL/min/1.73m² | 76.6 ± 27.3 | 79.0 ± 29.3 |  | 76.4 ± 26.9 | 78.0 ± 30.5 |  |  |
| ≥ 90 mL/min/1.73m² | 717 (64.7) | 25,959 (57.1) | 0.157 | 643 (65.1) | 629 (63.7) | 0.030 |  |
| AST |  |  |  |  |  |  |  |
| Mean ± SD, U/L | 26.1 ± 18.8 | 28.2 ± 40.2 |  | 26.0 ± 18.9 | 27.3 ± 26.7 |  |  |
| ≥ 40 U/L | 520 (46.9) | 14,758 (32.4) | 0.299 | 453 (45.9) | 460 (46.6) | 0.014 |  |
| C reactive protein |  |  |  |  |  |  |  |
| Mean ± SD, mg/L | 32.5 ± 52.2 | 41.5 ± 62.0 |  | 32.3 ± 53.4 | 38.2 ± 58.4 |  |  |
| ≥ 1 mg/L | 336 (30.3) | 7,954 (17.5) | 0.304 | 287 (29.0) | 292 (29.6) | 0.011 |  |
| Procedures |  |  |  |  |  |  |  |
| Surgery | 1,067 (96.3) | 41,921 (92.2) | 0.178 | 950 (96.2) | 948 (96.0) | 0.010 |  |
| Radiation oncology treatment | 358 (32.3) | 13,626 (30.0) | 0.051 | 325 (32.9) | 311 (31.5) | 0.030 |  |

The emulation specified new-user, active-comparator strategies: ICI with concomitant GLP-1 RA versus ICI alone. Time zero was the protocol-defined index date; baseline covariates were assessed during the 12 months prior to index. Columns display pre-match cohorts and the 1:1 propensity-score–matched cohorts used for the intention-to-treat (ITT) analyses. Categorical variables are shown as n (%); continuous variables are summarized per data availability as mean (SD) or category counts. Percentages use the cohort denominator for that column. Variables with structured “Unknown/Unavailable” categories in TriNetX are retained as separate levels; no imputation was performed. Standardized mean differences (SMDs) quantify balance; |SMD| >0.10 suggests residual imbalance. GLP-1 RA, glucagon-like peptide-1 receptor agonist; ICI, immune checkpoint inhibitor; PSM, propensity-score matching; SMD, standardized mean difference; IHD, ischemic heart disease; CKD, chronic kidney disease; BMI, body mass index; Cr, creatinine; HbA1c, glycated hemoglobin; HDL, high-density lipoprotein cholesterol; LDL, low-density lipoprotein cholesterol; eGFR, estimated glomerular filtration rate; AST, aspartate aminotransferase; PD-1, programmed cell death-1; PD-L1, programmed death-ligand 1; ACEi, angiotensin-converting enzyme inhibitors; ARBs, angiotensin receptor blockers.

Supplementary Table 6. GLP-1 receptor agonist–related safety outcomes during immune checkpoint inhibitor therapy among individuals with obesity and cancer

|  | Exposure Cohort | Comparator Cohort | Risk Difference  (95% CI) | ARD (%) | NNT  (3y) | HR-Based  RRR (%) | HR (95% CI) | *P* value | Adjusted  *P* value  (BH Method) | E-value for HR | E-value  for Lower CI of HR |
| --- | --- | --- | --- | --- | --- | --- | --- | --- | --- | --- | --- |
| ICI+GLP-1 RA vs ICI |  |  |  |  |  |  |  |  |  |  |  |
| Drug-induced hypoglycaemia | 104/ 545 (19.08) | 182/ 543 (33.52) | -0.144 (-0.196, -0.093) | -14.43 | 7 | +36.04 | 0.53 (0.42, 0.68) | <0.001 | <0.001 | 3.15 | 2.30 |
| Acute kidney injury | 101/ 812 (12.44) | 168/ 803 (20.92) | -0.085 (-0.121, -0.049) | -8.48 | 13 | +24.63 | 0.59 (0.46, 0.75) | <0.001 | <0.001 | 2.79 | 1.98 |
| Dehydration/Orthostatic hypotension | 121/ 699 (17.31) | 206/ 694 (29.68) | -0.124 (-0.168, -0.080) | -12.37 | 7 | +37.81 | 0.54 (0.43, 0.67) | <0.001 | <0.001 | 3.13 | 2.34 |
| NCOs | 79/ 690 (11.45) | 77/ 737 (10.45) | 0.010 (-0.022, 0.042) | +1.00 | NA | NA | 1.18 (0.86, 1.62) | 0.290 | NA | NA | NA |

Estimates reported. For each outcome, the table displays events/total (%), 36-month risk (Kaplan–Meier estimate), absolute risk difference (ARD, percentage points), number needed to treat (NNT), and hazard ratio (HR) with 95% confidence interval (CI). HRs were estimated from Cox proportional-hazards models in the 1:1 propensity-score–matched cohorts with robust variance clustered by healthcare organization. Proportional-hazards assumptions were reviewed on exported datasets. Numbers needed to treat are computed as NNT(t)=1/|F treat(t)−Fcontrol(t)∣, where Fgroup(t) is the cumulative incidence by time t for that group, and are rounded upward to whole numbers. Negative ARD values correspond to NNT for benefit; positive ARD values correspond to NNT for harm. NNT is a time-specific estimate at 36 months (i.e., NNT(3y)). Multiplicity across prespecified secondary endpoints was addressed using the Benjamini–Hochberg false-discovery rate procedure. E-values for key endpoints to contextualize the strength of unmeasured confounding that would be needed to explain the observed associations. Denominators may vary across outcomes due to prior-event exclusions and data availability. Variables with structured “Unknown/Unavailable” categories in TriNetX were retained as separate levels; no imputation was performed. ARD, absolute risk difference; CI, confidence interval; eGFR, estimated glomerular filtration rate; GLP-1 RA, glucagon-like peptide-1 receptor agonist; HR, hazard ratio; ICI, immune checkpoint inhibitor; ICU, intensive care unit; NNT, number needed to treat; PSM, propensity-score matching.


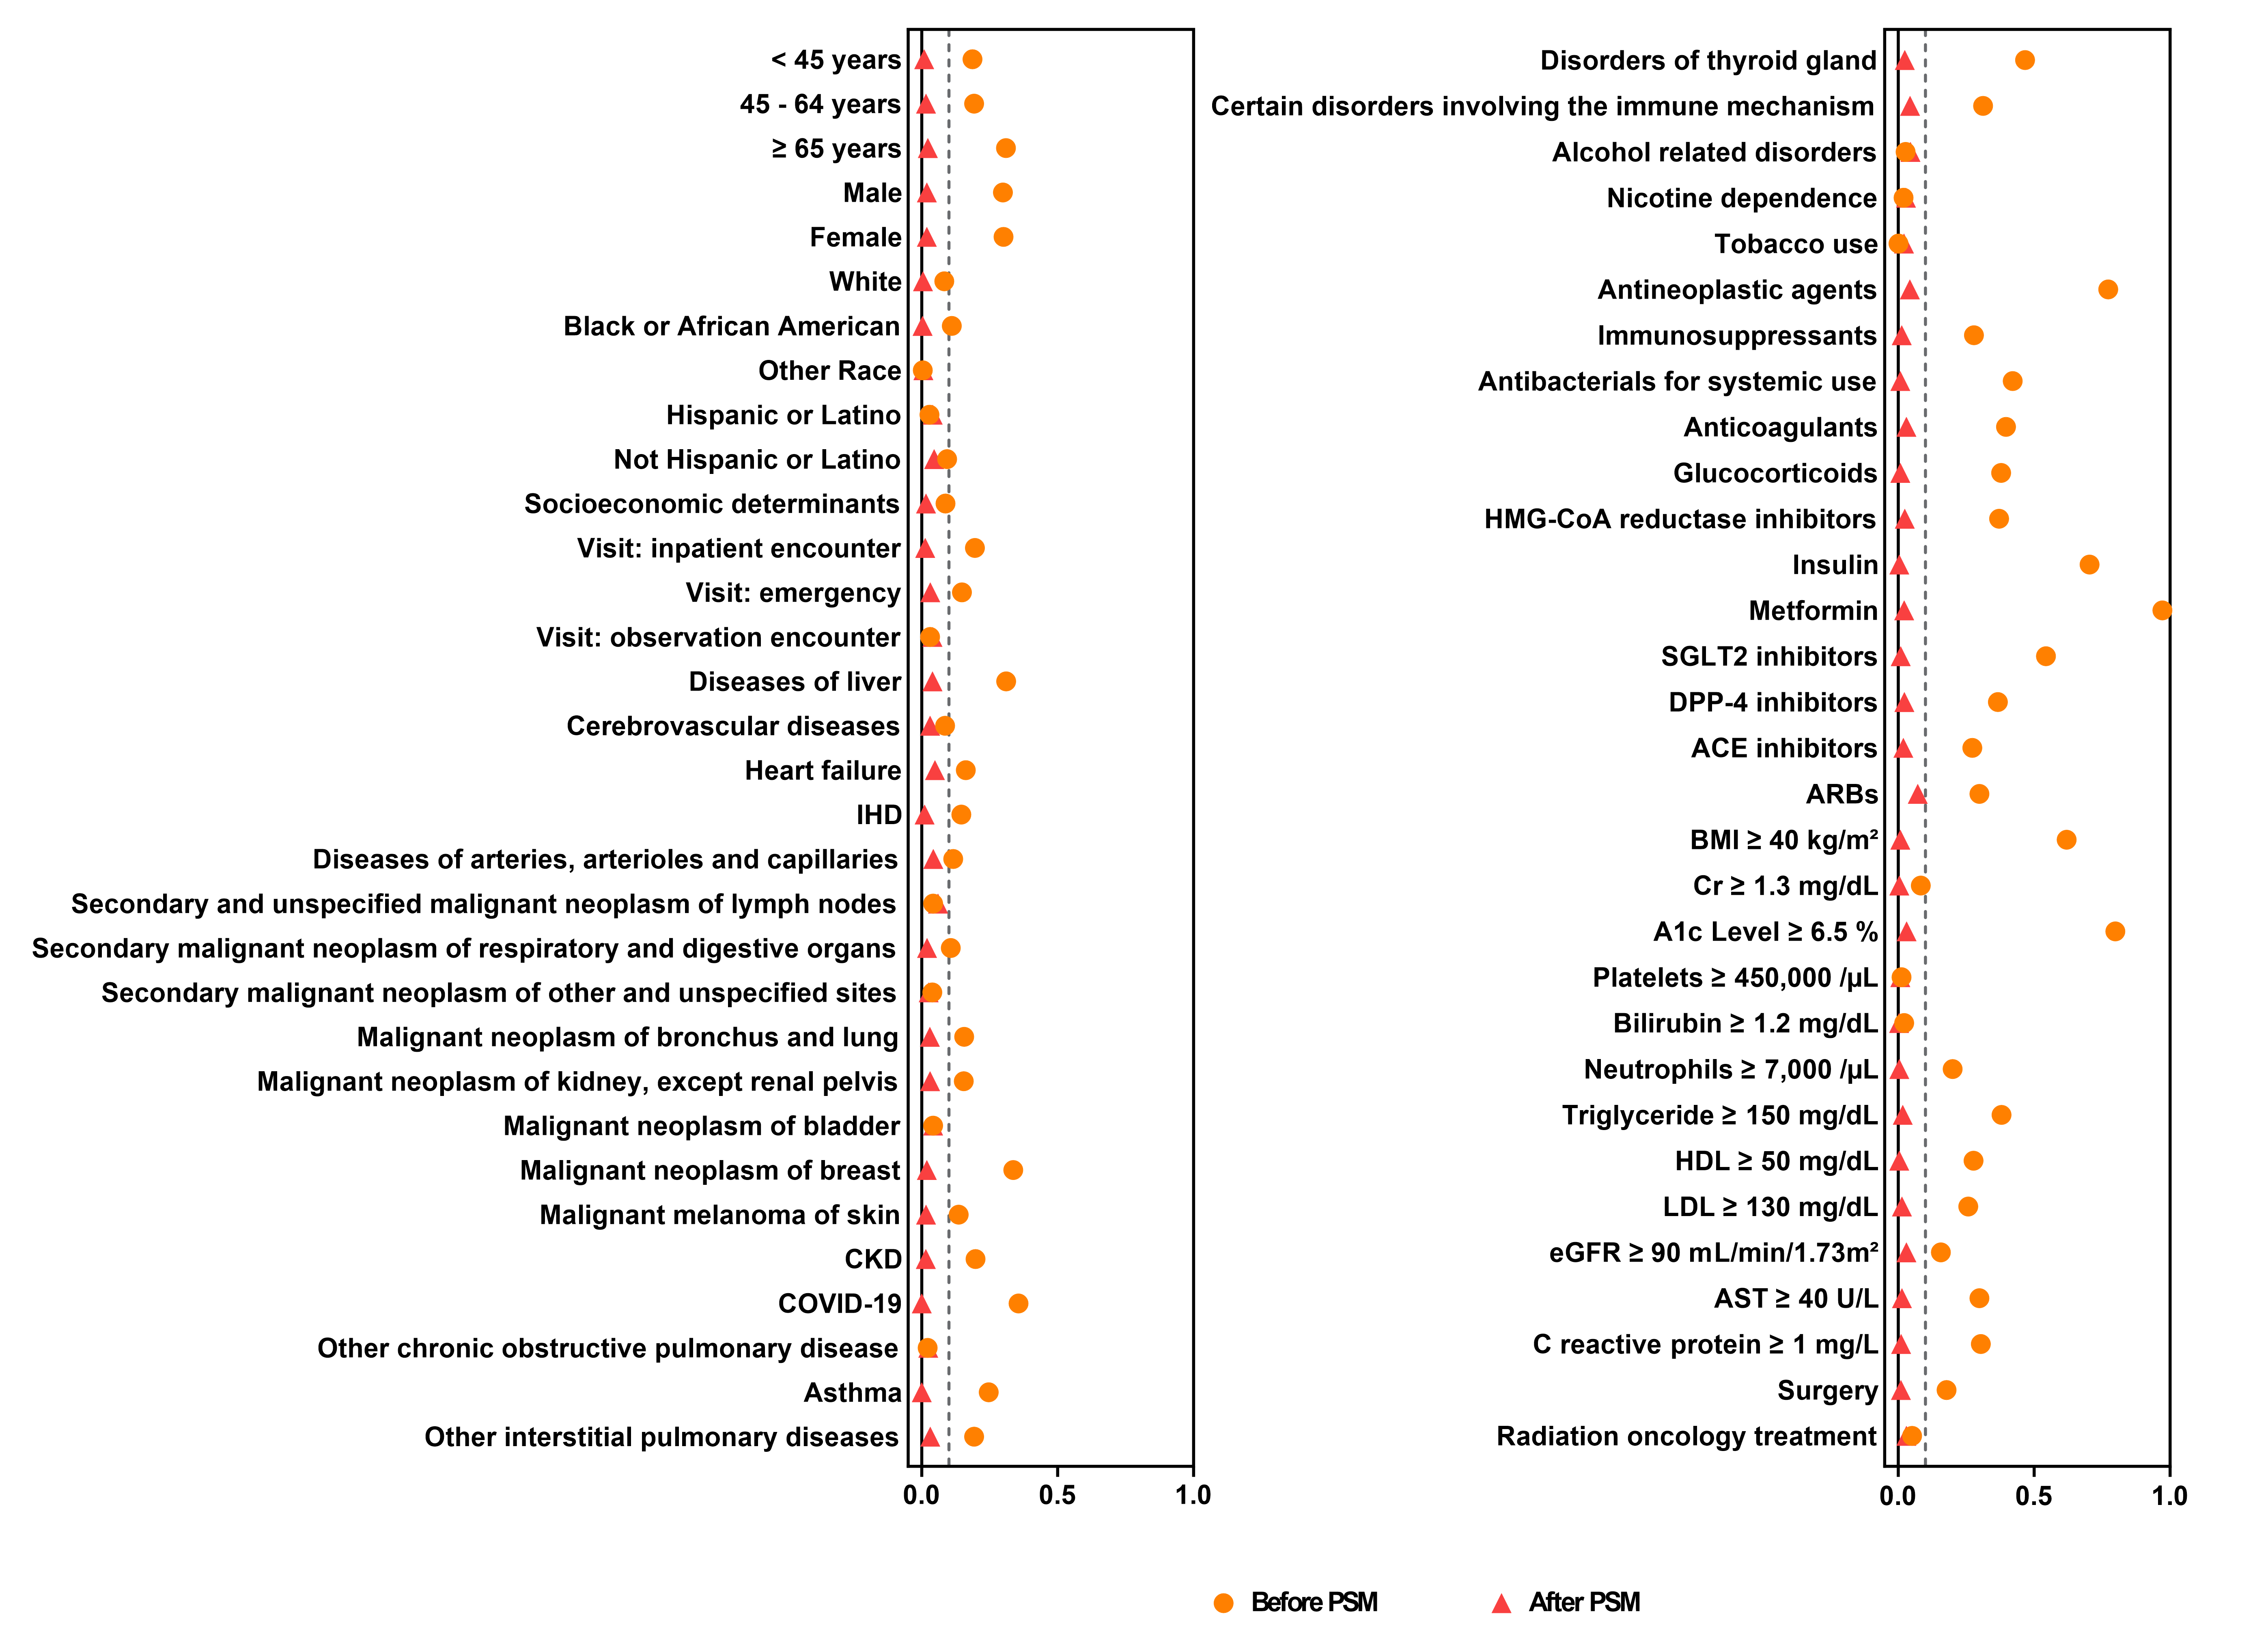


Supplementary **Figure 1.** Standardized mean differences before and after matching. Standardized mean differences (SMDs) are shown for all baseline covariates before and after matching. Vertical reference lines indicate |SMD| = 0.10 and 0. Post-match SMDs were <0.05 for nearly all variables, supporting adequate balance prior to outcome modeling.


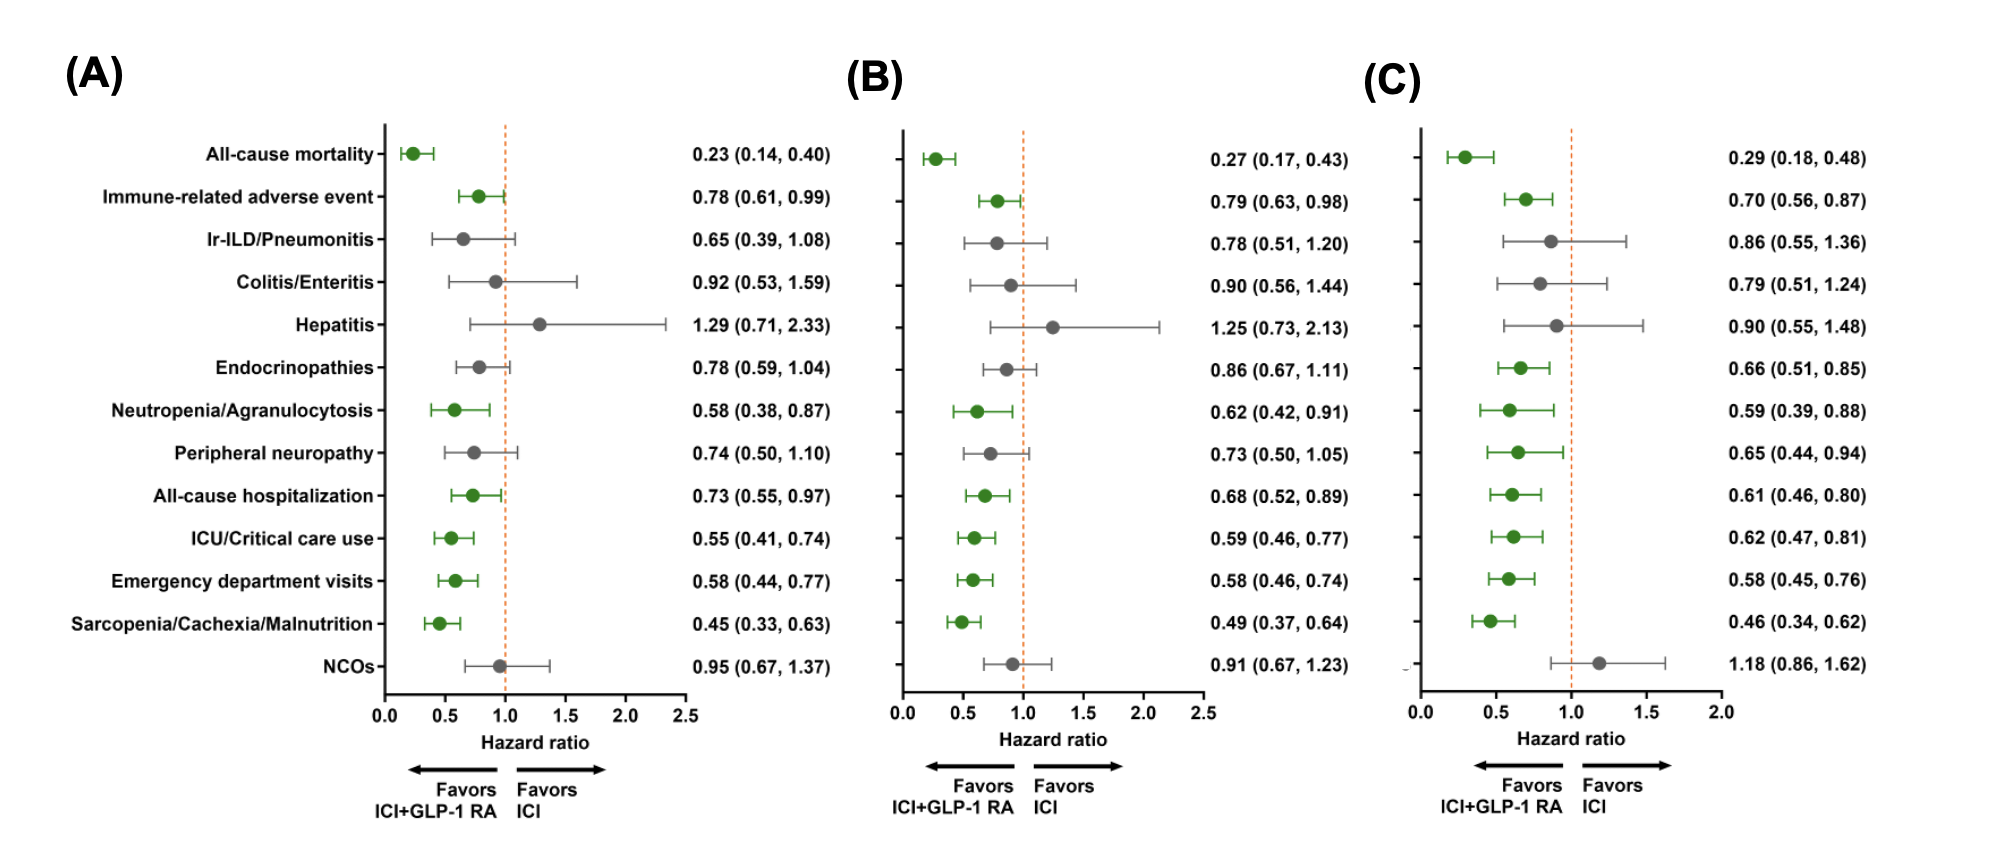


SupplementaryFigure 2. Hazard ratios for clinical outcomes at 12, 24, and 36 months among matched patients receiving immune checkpoint inhibitors with vs without concomitant GLP-1 receptor agonists. Forest plots summarise hazard ratios with 95% confidence intervals from Cox proportional hazards models in 1:1 propensity score matched intention to treat cohorts, comparing immune checkpoint inhibitors with concomitant GLP-1 receptor agonists versus immune checkpoint inhibitors without GLP-1 receptor agonists as the reference. Panel A shows estimate through 12 months, Panel B through 24 months, and Panel C through 36 months. The vertical reference line marks a hazard ratio of 1.0. Points in green indicate confidence intervals that do not include 1.0, whereas grey points indicate intervals that include 1.0. Outcomes include all-cause mortality, composite immune related adverse events and selected components, healthcare utilization measures, sarcopenia cachexia malnutrition, and a negative control composite.


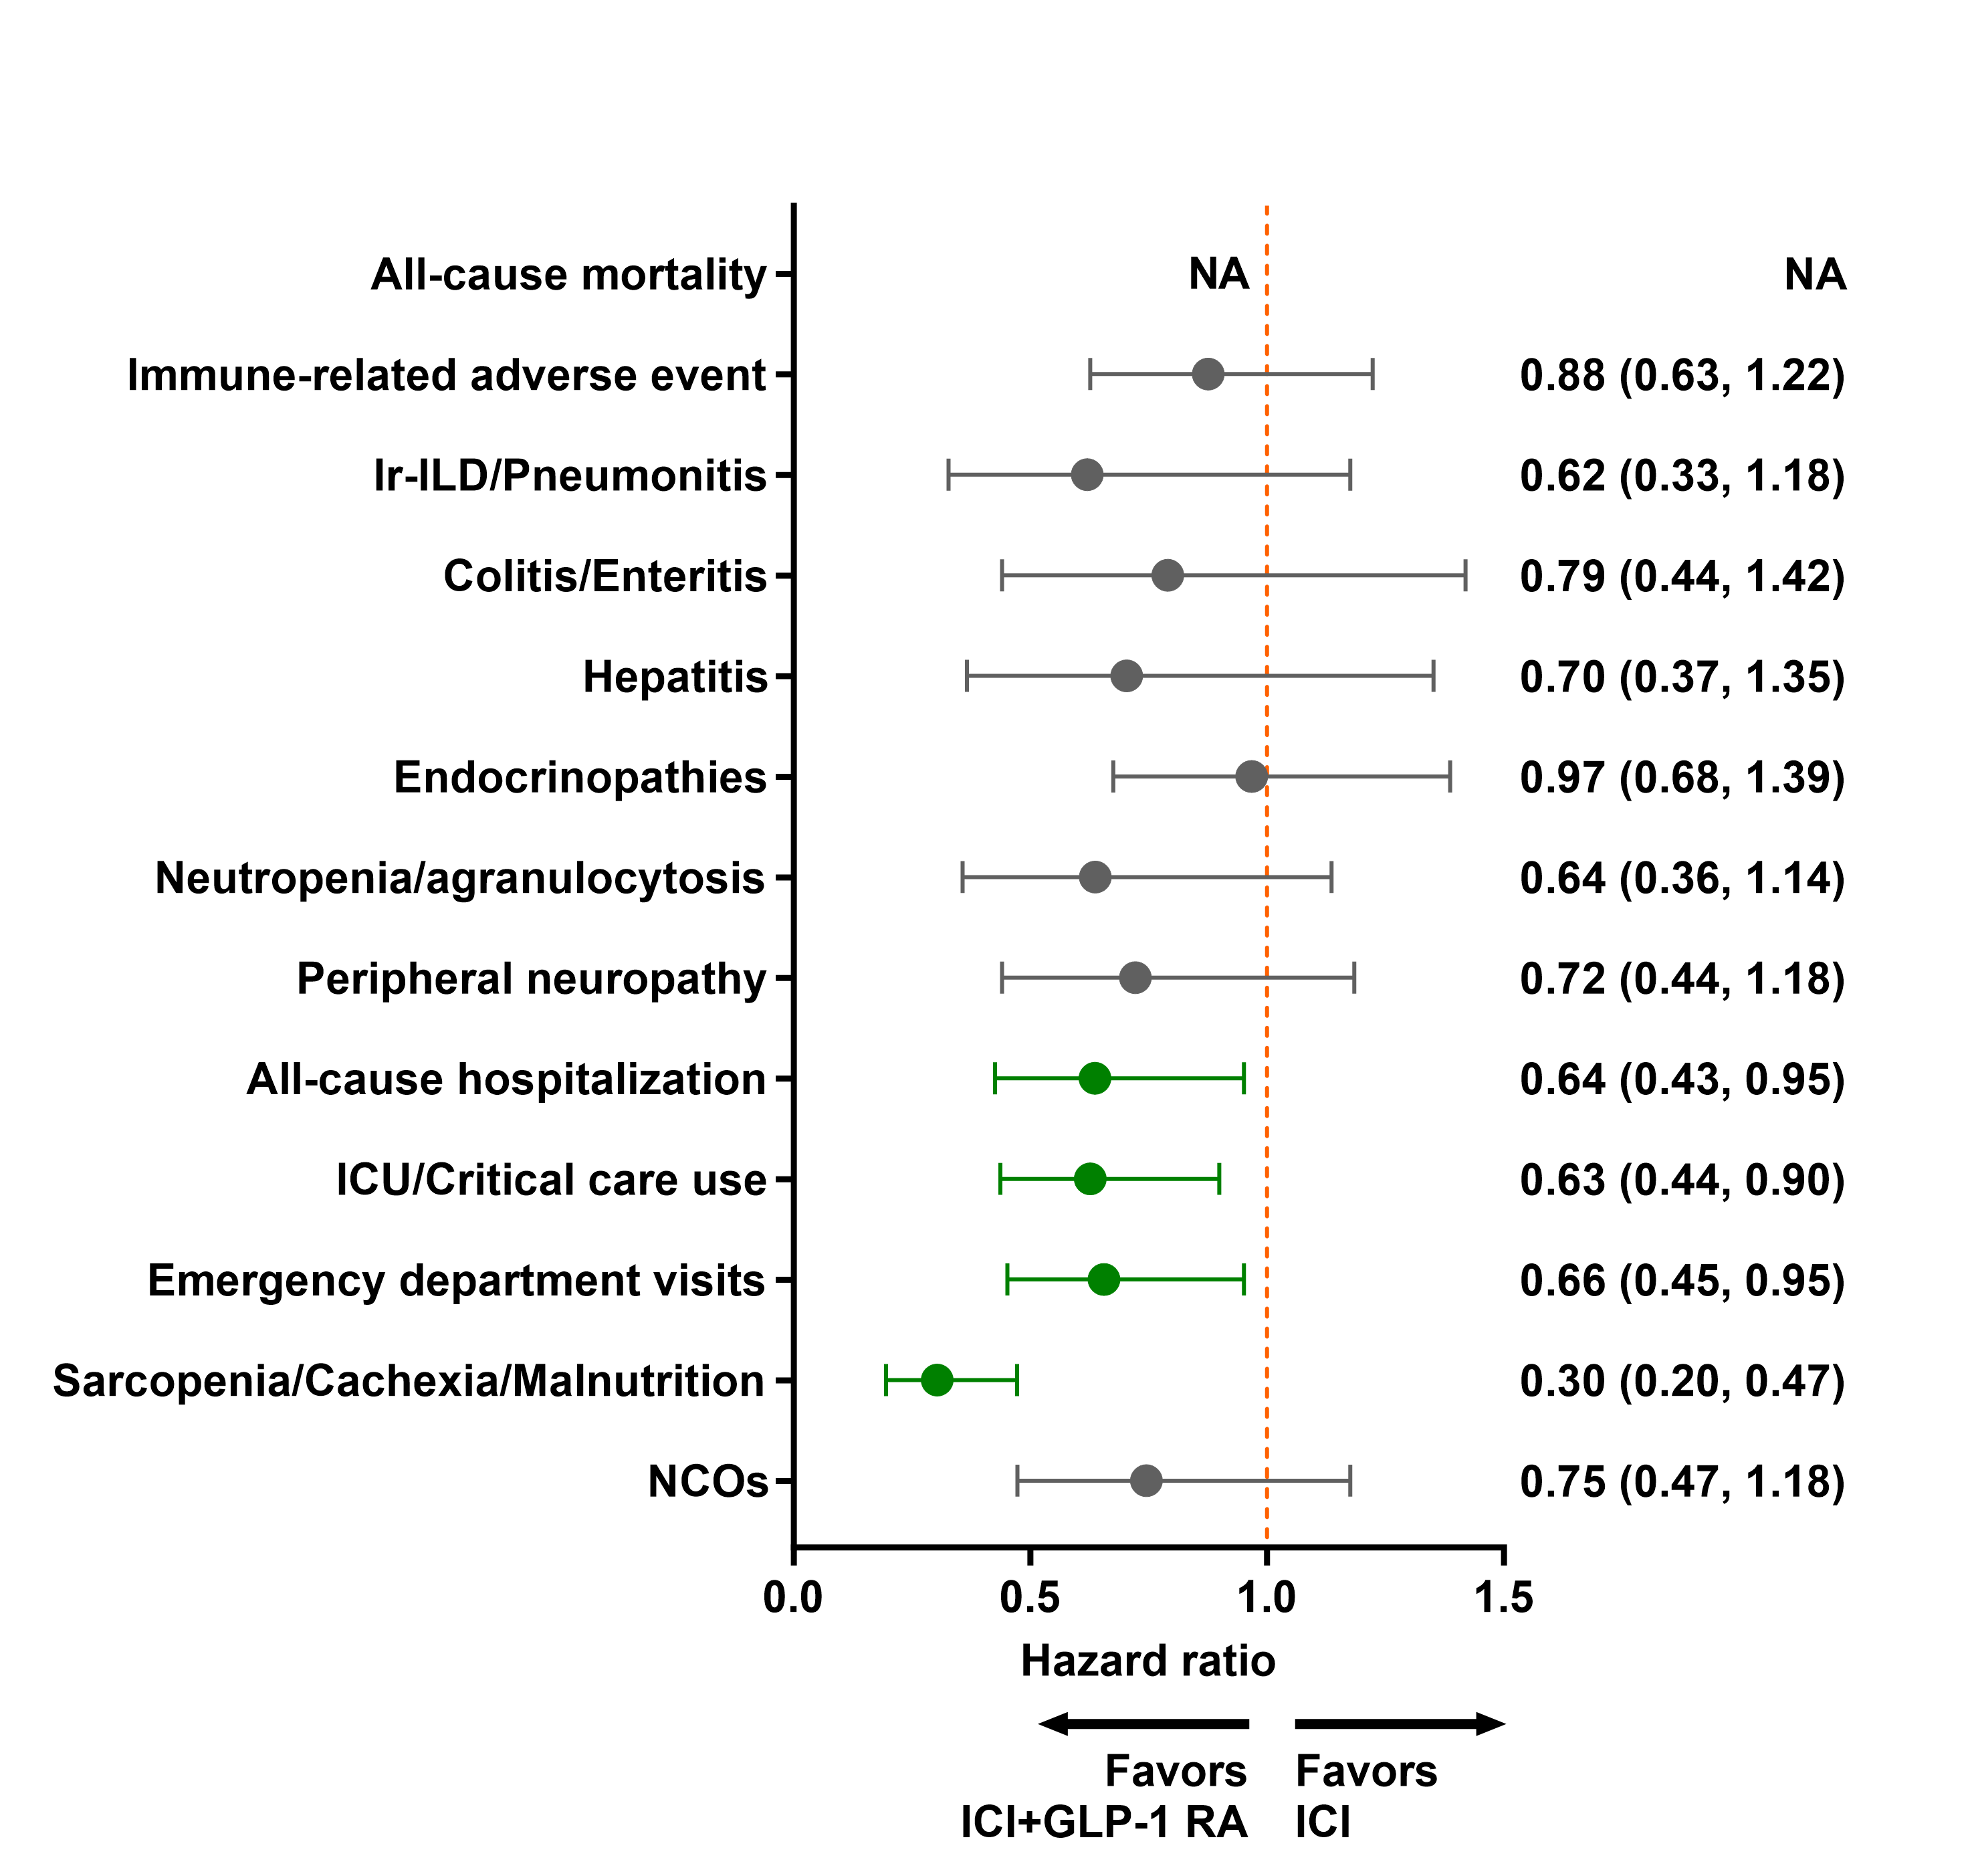


Supplementary **Figure 3.** Sensitivity Analysis - Specifying the Semaglutide Brand. Forest plot of hazard ratios (HRs) with 95% confidence intervals comparing immune checkpoint inhibitors (ICI) with concomitant GLP-1 receptor agonists (GLP-1 RA) versus ICI without GLP-1 RA (reference). Estimates derive from Cox proportional hazards models in 1:1 propensity-score–matched intention-to-treat (ITT) cohorts. Follow-up starts on day 1 after index ICI and extends through 36 months. GLP-1 RA, glucagon-like peptide-1 receptor agonist; ICI, immune checkpoint inhibitor; ITT, intention-to-treat; irAE, immune-related adverse event; ir-ILD, immune-related interstitial lung disease; ICU, intensive care unit; NCO, negative control outcome.


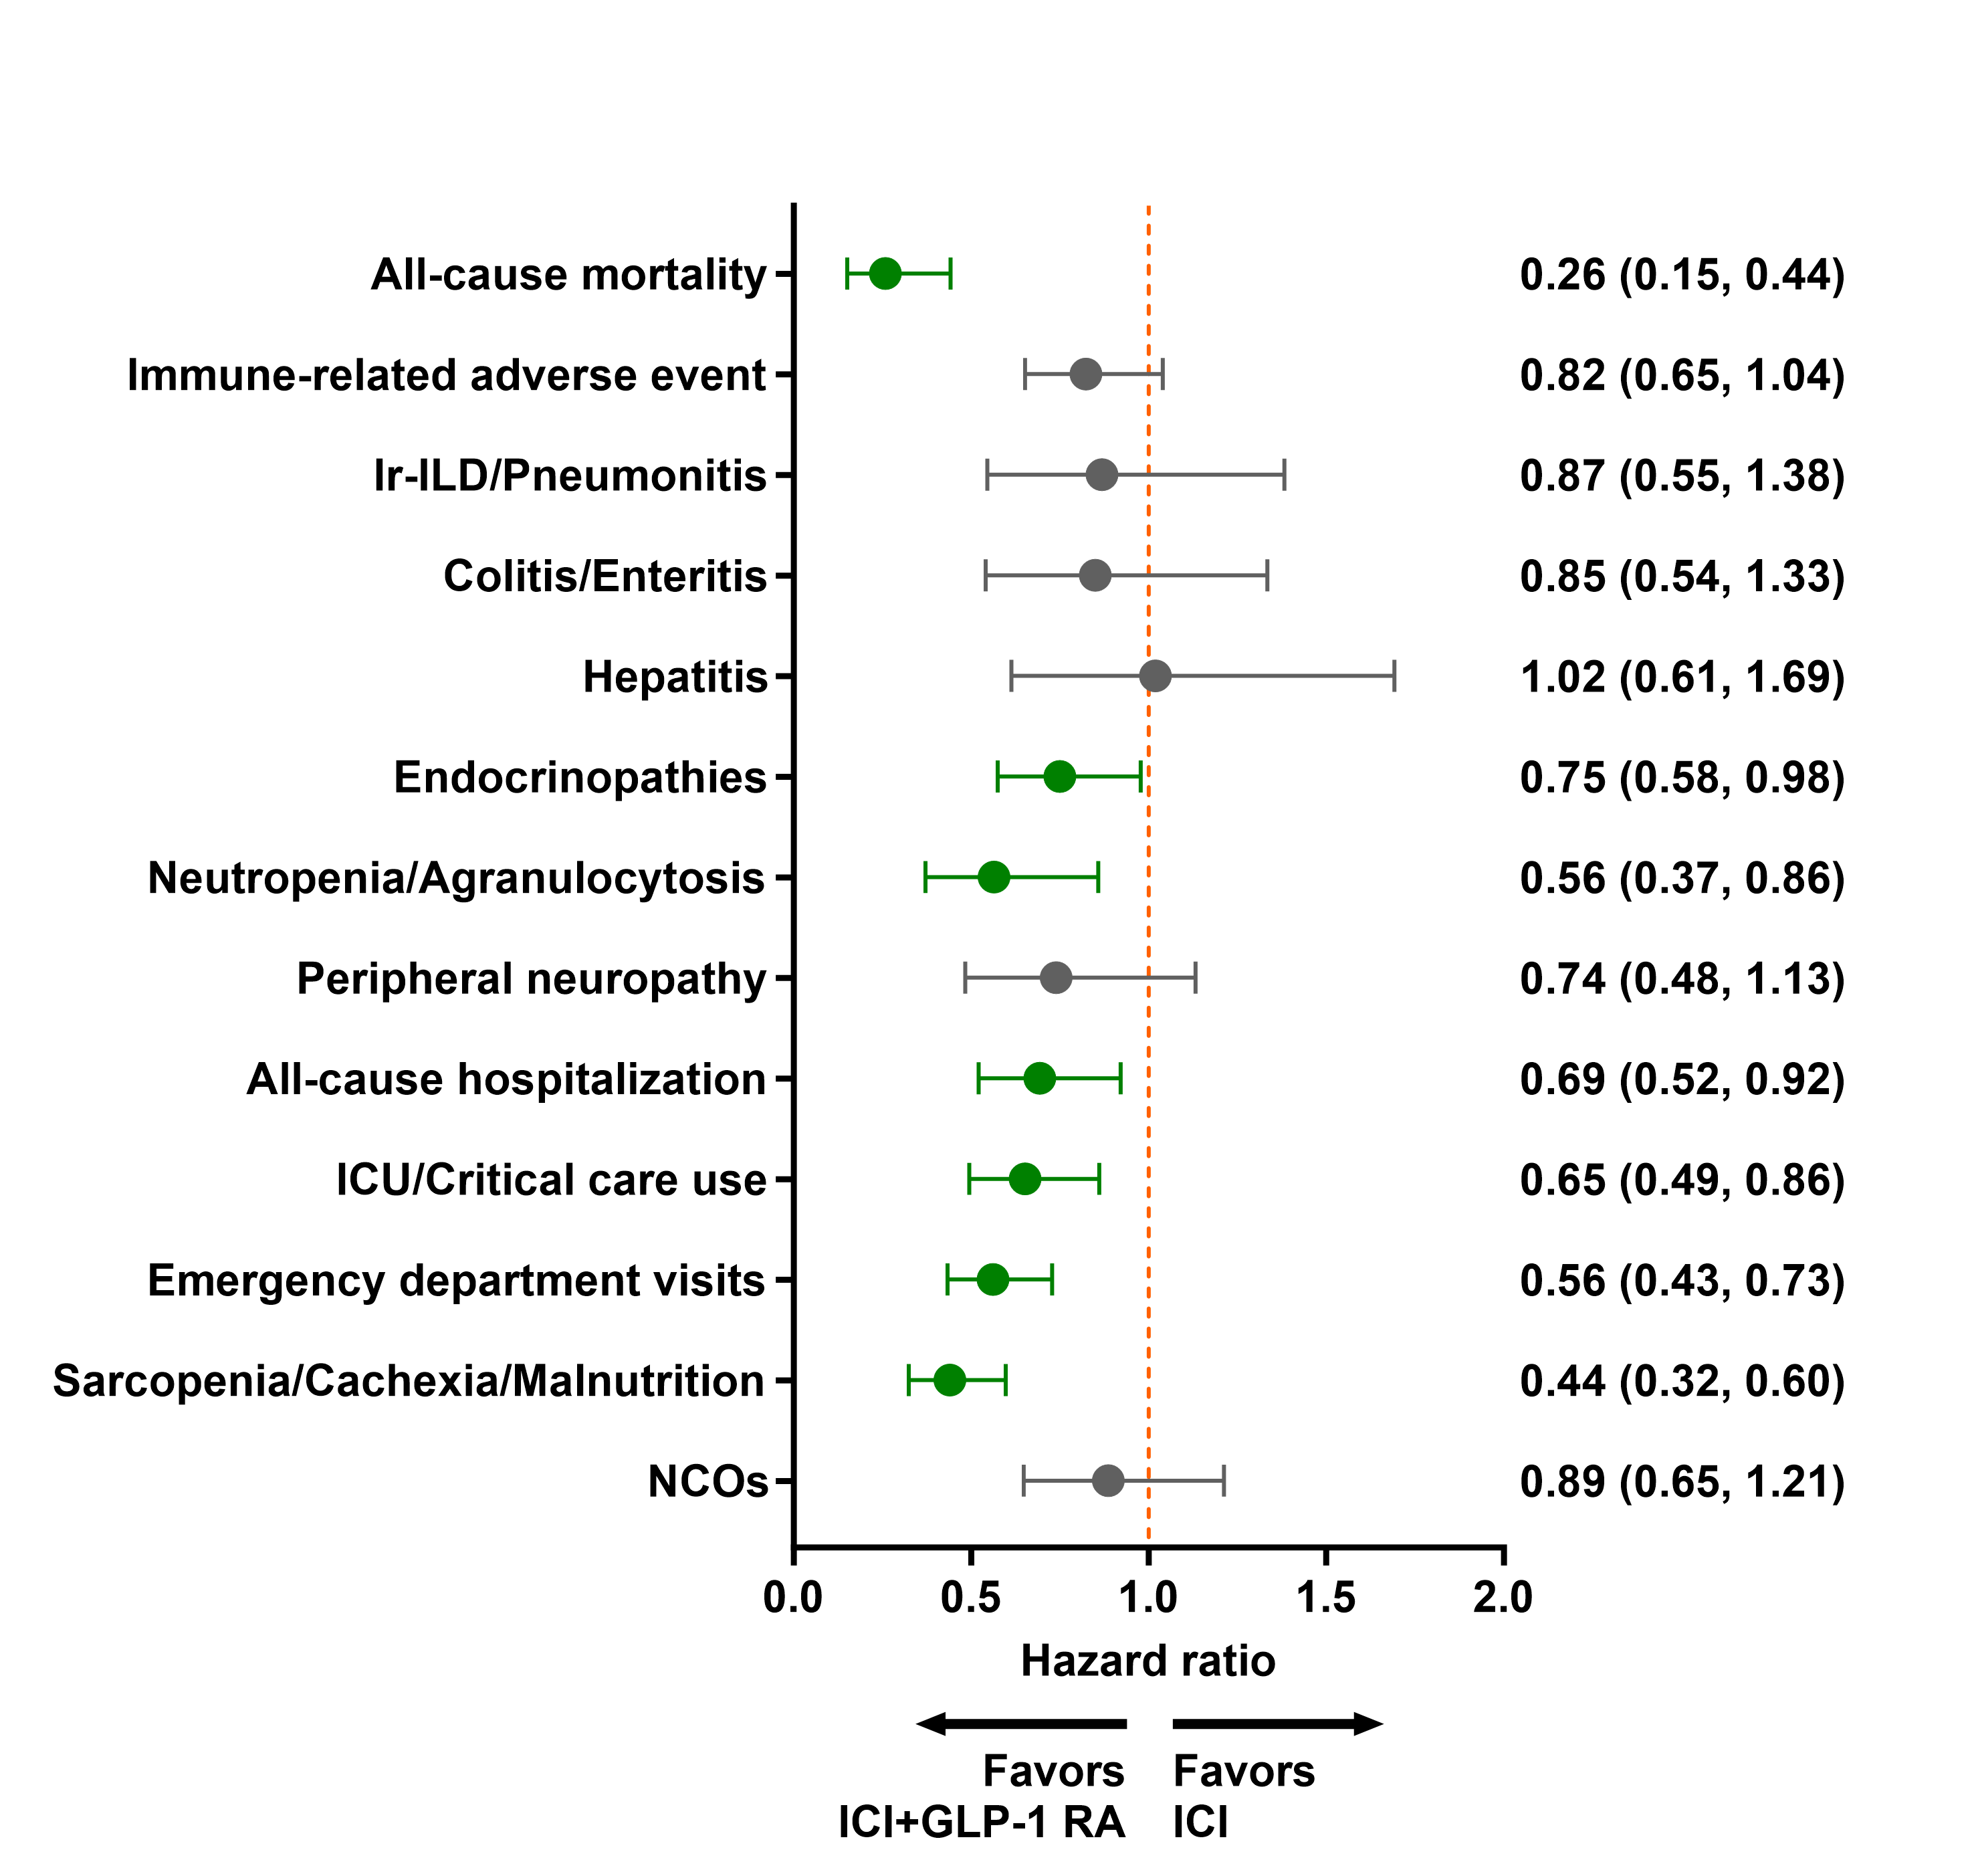


Supplementary **Figure 4.** Sensitivity Analysis – 12-months washout. Forest plot of hazard ratios (HRs) with 95% confidence intervals comparing immune checkpoint inhibitors (ICI) with concomitant GLP-1 receptor agonists (GLP-1 RA) versus ICI without GLP-1 RA (reference). Estimates derive from Cox proportional hazards models in 1:1 propensity-score–matched intention-to-treat (ITT) cohorts. Follow-up starts on day 1 after index ICI and extends through 36 months. GLP-1 RA, glucagon-like peptide-1 receptor agonist; ICI, immune checkpoint inhibitor; ITT, intention-to-treat; irAE, immune-related adverse event; ir-ILD, immune-related interstitial lung disease; ICU, intensive care unit; NCO, negative control outcome.


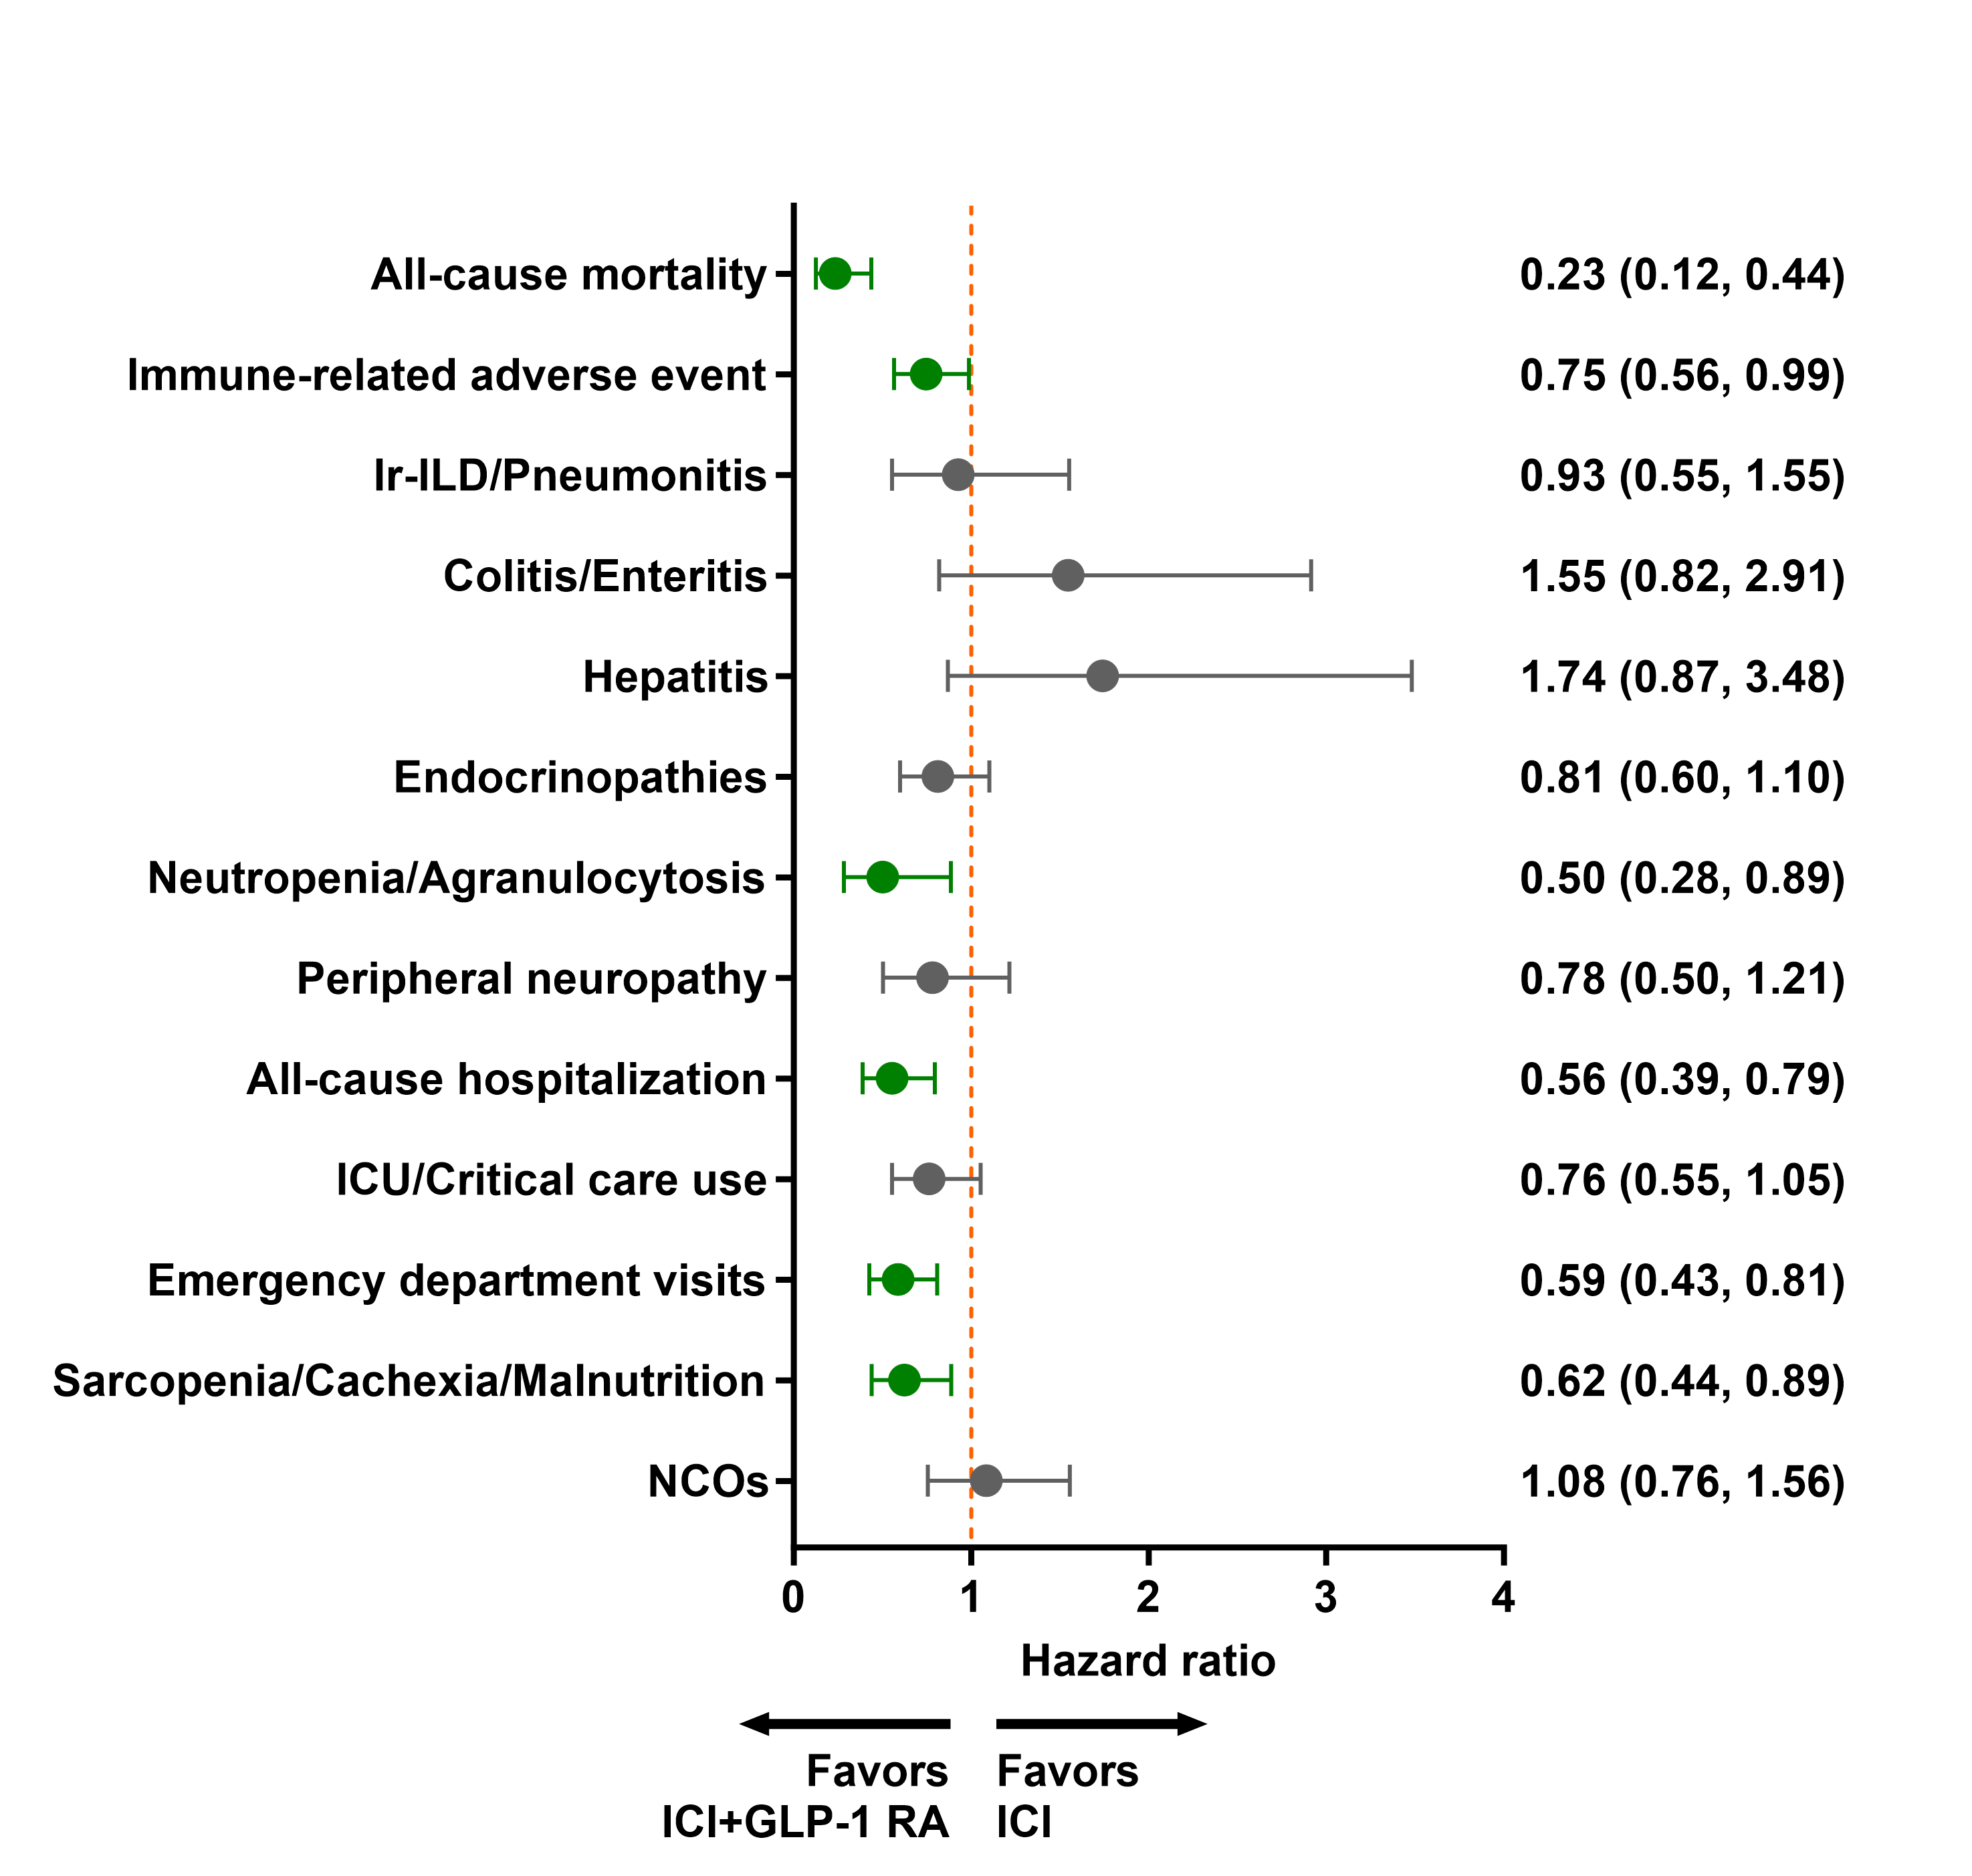


Supplementary **Figure 5.** Sensitivity analysis - Three-month landmark. Forest plot of hazard ratios (HRs) with 95% confidence intervals comparing immune checkpoint inhibitors (ICI) with concomitant GLP-1 receptor agonists (GLP-1 RA) versus ICI without GLP-1 RA (reference). Estimates derive from Cox proportional hazards models in 1:1 propensity-score–matched intention-to-treat (ITT) cohorts. Follow-up starts on day 1 after index ICI and extends through 36 months. GLP-1 RA, glucagon-like peptide-1 receptor agonist; ICI, immune checkpoint inhibitor; ITT, intention-to-treat; irAE, immune-related adverse event; ir-ILD, immune-related interstitial lung disease; ICU, intensive care unit; NCO, negative control outcome.


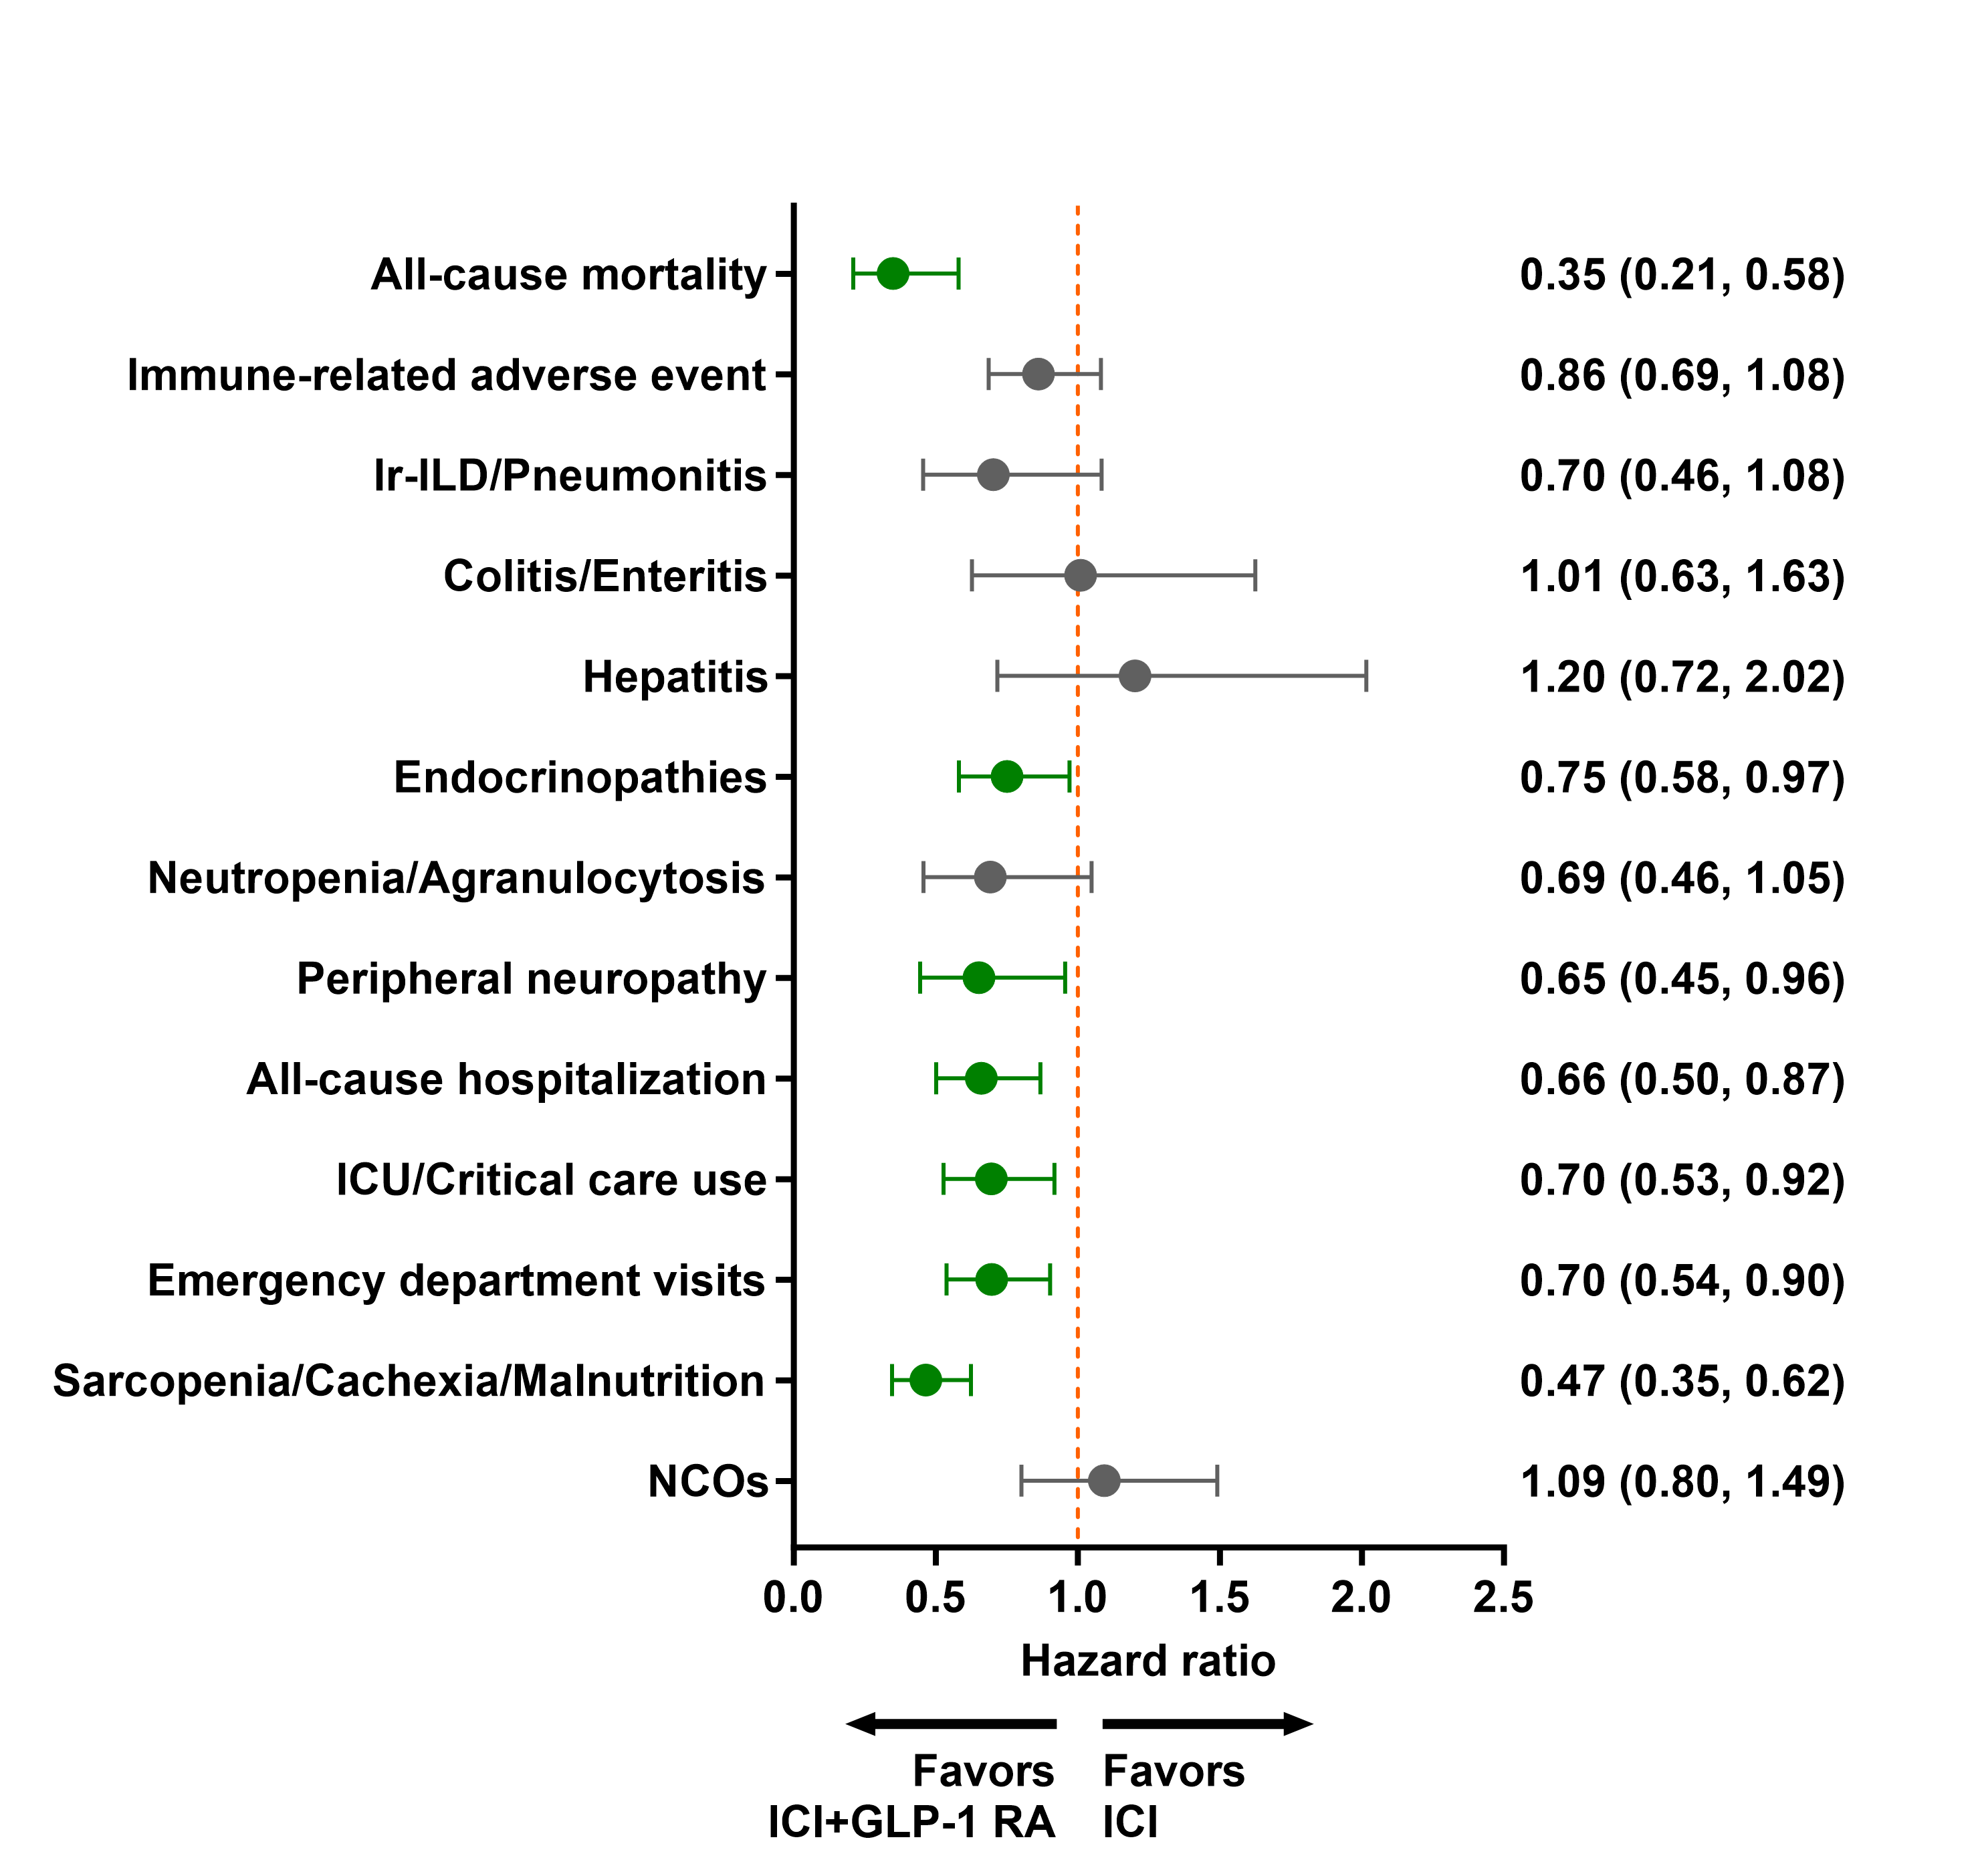


Supplementary **Figure 6.** Sensitivity Analysis – Global region. Forest plot of hazard ratios (HRs) with 95% confidence intervals comparing immune checkpoint inhibitors (ICI) with concomitant GLP-1 receptor agonists (GLP-1 RA) versus ICI without GLP-1 RA (reference). Estimates derive from Cox proportional hazards models in 1:1 propensity-score–matched intention-to-treat (ITT) cohorts. Follow-up starts on day 1 after index ICI and extends through 36 months. GLP-1 RA, glucagon-like peptide-1 receptor agonist; ICI, immune checkpoint inhibitor; ITT, intention-to-treat; irAE, immune-related adverse event; ir-ILD, immune-related interstitial lung disease; ICU, intensive care unit; NCO, negative control outcome.


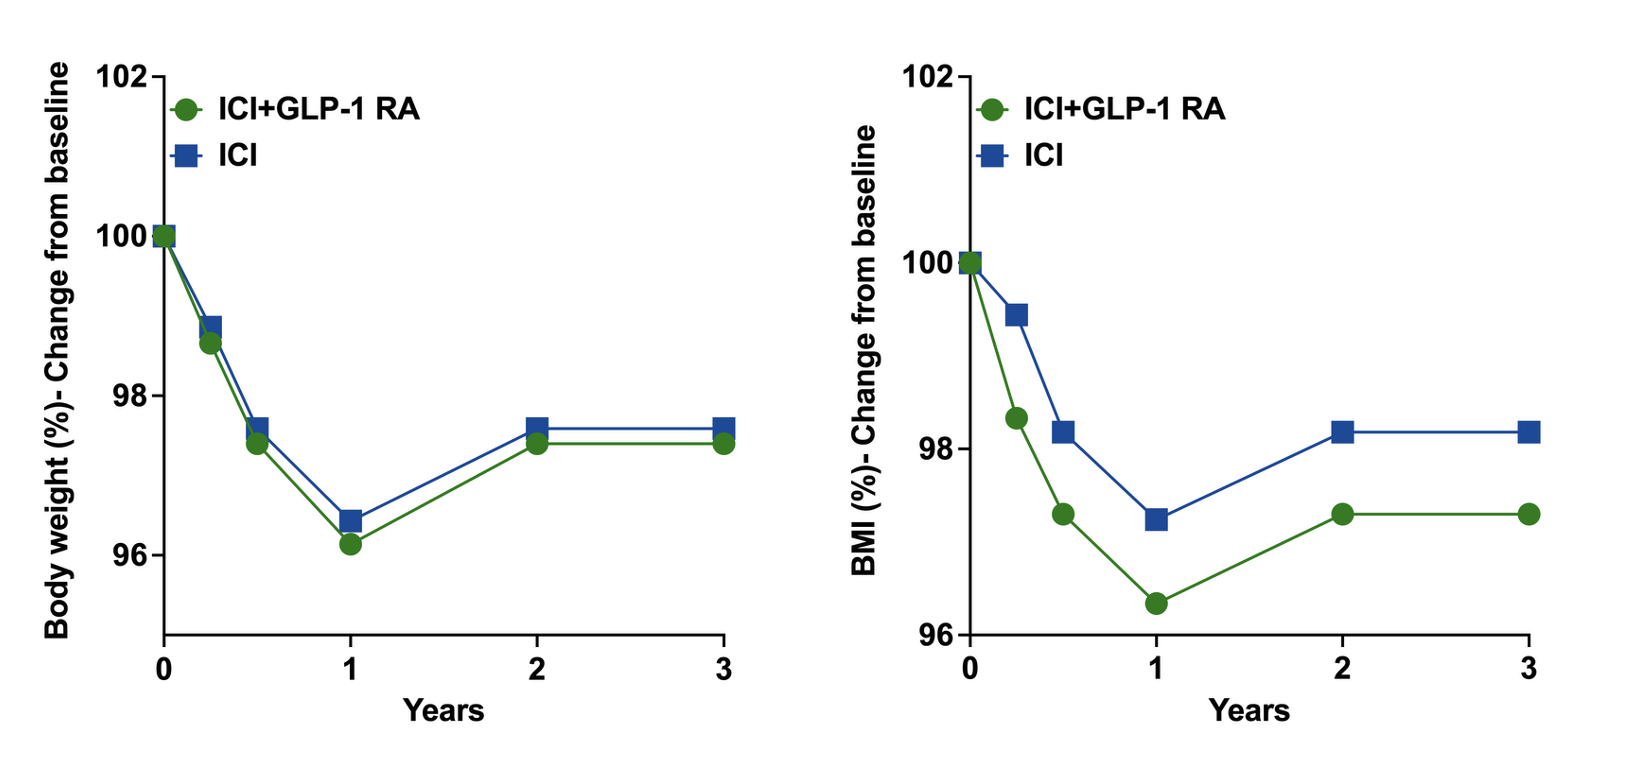


Supplementary **Figure 7. Longitudinal trajectories of body weight and body mass index after immune checkpoint inhibitor initiation in the propensity score matched cohort.**
